# 1 Effect of Helical Kink in 2 Antimicrobial Peptides on 3 Membrane Pore Formation

4 Alžběta Türková<sup>1,2,†‡</sup>, Ivo Kabelka<sup>1,2,†</sup>, Tereza Králová<sup>1</sup>, Lukáš Sukeník<sup>1,4</sup>, Šárka  
5 Pokorná<sup>5</sup>, Martin Hof<sup>5</sup>, Robert Vácha<sup>1,2,4</sup>

**\*For correspondence:**

[robert.vacha@mail.muni.cz](mailto:robert.vacha@mail.muni.cz) (RV)

†These authors contributed equally  
to this work

**Present address:** ‡Current  
address: University of Vienna,  
Department of Pharmaceutical  
Chemistry, Althanstraße 14, A-1090  
Vienna, Austria

6 <sup>1</sup>CEITEC – Central European Institute of Technology, Masaryk University, Kamenice 753/5,  
7 625 00 Brno, Czech Republic; <sup>2</sup>National Centre for Biomolecular Research, Faculty of  
8 Science, Masaryk University, Kamenice 5, 625 00 Brno, Czech Republic; <sup>4</sup>Department of  
9 Condensed Matter Physics, Faculty of Science, Masaryk University, Kotlářská 2, 611 37  
10 Brno, Czech Republic; <sup>5</sup>Department of Biophysical Chemistry, J. Heyrovský Institute of  
11 Physical Chemistry of the Academy of Sciences of the Czech Republic, v.v.i., Dolejškova 3,  
12 182 23 Prague, Czech Republic

13  
14 **Abstract** Antimicrobial peptides (AMPs) can kill pathogens via the formation of permeable  
15 membrane pores. However, matching peptide properties with their ability to form pores remains  
16 elusive. In particular, the proline/glycine kink in helical AMPs was reported to both increase and  
17 decrease antimicrobial activity. We used computer simulations and fluorescence leakage  
18 experiments to show that a kink in helices affects the formation of membrane pores by stabilizing  
19 toroidal pores but disrupting barrel-stave pores. The precise position of the proline/glycine kink in  
20 the sequence further controls the formation of specific toroidal pore structure: U- or  
21 hourglass-shaped. Moreover, we demonstrate that two helical peptides can form a stable kink-like  
22 connection with similar behavior as one long helical peptide with kink. The provided  
23 molecular-level insight can be utilized for rational design or modification of antibacterial peptides  
24 or toxins to alter their ability to form membrane pores.

## 25 Introduction

26 Antimicrobial peptides (AMPs) are ubiquitous components of the innate defense system of many  
27 organisms. (1; 2) These peptides can selectively kill bacteria, viruses, fungi, or cancer cells at low  
28 concentrations. (3; 4; 5) Despite the discovery of thousands of AMPs, the molecular mechanism  
29 of their activity remains poorly understood. One of the most prominent mechanisms of action  
30 of AMPs is the formation of membrane pores. There are two well-established pore structures:  
31 barrel-stave and toroidal. In the barrel-stave pore structure, all peptides are tightly bound into a  
32 bundle with only little effect on neighboring lipids. (6) In contrast, the presence of lipid head groups  
33 inside the pore together with peptides is characteristic for toroidal pores. (7) Currently, there is no  
34 known relation between the sequences of AMPs and their pore-forming ability due to the practical  
35 difficulties of determining the transient structures of membrane pores.

36 AMPs possess an amphiphilic character with a sequence composed of both hydrophobic and  
37 hydrophilic residues arranged in discrete clusters. (8) Such a distribution is thought to be the key  
38 factor for binding to the pathogen's membrane and its disruption, while a common positive net  
39 charge is responsible for the increased selectivity towards bacterial cells. (9; 10) AMPs are typically  
40

41 unstructured in solution and frequently adopt an  $\alpha$ -helical conformation upon interaction with  
42 the membrane. Their sequence can contain proline or glycine residues, which cause perturbation  
43 in the regular  $\alpha$ -helical pattern. As a result, a substantial number of the known AMPs has been  
44 determined to possess a helix-kink-helix motif. (11) The presence of a helical kink has been shown  
45 to be biologically relevant or even responsible for the AMP's activity. (12; 13) However, the effect of  
46 the kink on antimicrobial activity has been the subject of controversy over the past few decades.  
47 Methodologically diverse studies have produced contradictory results, reporting the helical kink to  
48 both enhance (14; 15; 16; 17; 18; 19; 20; 21; 22; 23; 24) and reduce (25; 26; 27) antimicrobial effects.  
49 Here, we used computer simulations supported by fluorescence experiments to explain the role  
50 of the helical kink in the formation of structurally-different pores. We calculated the free energy  
51 associated with pore formation under various conditions using Monte Carlo (MC) simulations with a  
52 highly coarse-grained phenomenological model (28; 29). Molecular dynamics (MD) simulations em-  
53 ploying a more detailed Martini model (35) confirmed the obtained results and matched structural  
54 features of various peptides (Magainin II (30), LL-37 (31), Buforin II (32),  $\delta$ -lysin (33), Candidalysin (34),  
55 and their mutants) with their effect on pore stability. We found that the presence of a kink disrupts  
56 barrel-stave, but stabilizes toroidal pores. Moreover, the position of the proline/glycine kink with  
57 respect to the hydrophobic patch on AMP determined the peptide arrangement within the toroidal  
58 pore. The pore formation of various mutants was further verified using a fluorescence leakage  
59 assay on large unilamellar vesicles (LUVs).

## 60 Results and Discussion

### 61 Contradictory Effect of $\alpha$ -helical Kink on Barrel-stave Pore and Toroidal Pore Mech- 62 anism

63 Firstly, we investigated the effect of general peptide properties on the formation of a barrel-stave  
64 pore (BP) and toroidal pore (TP) using MC simulations with phenomenological models (28) (see  
65 Figure 1B, C and Figure 2A, B). We found two conditions for efficient BP formation which are in  
66 agreement with previously reported findings: (1) Strong peptide-peptide interaction, which stabilizes  
67 the bundle assembly. (36) In our model, the interaction between the peptides was mediated mainly  
68 via hydrophobic interactions, thus the peptide hydrophobic content had to be higher than 50%  
69 (patch of 180°) to interact with both lipid tails and surrounding peptides effectively. (2) The peptide  
70 should be oriented roughly perpendicular to the membrane plane. Therefore, the overall length  
71 of the hydrophobic part should span the membrane thickness and peptide termini have to be  
72 composed of either hydrophilic or charged residues. (37) The formation of TPs was observed over a  
73 broader range of peptide properties than for the peptides forming BPs. Mainly the hydrophobic  
74 content/patch was less than or equal to 50% (patch of 180°). The complete set of tested parameters  
75 and formed pores is provided in Table S1 and Table S2.

76 Secondly, the role of kink flexibility was investigated by using two models of  $\alpha$ -helical peptides: (1)  
77 Peptides without and (2) peptides with a fully flexible kink in the middle. Free energy profiles  
78 show that the formation of a BP by peptides without the kink is more energetically favorable,  
79 compared to formation of pores by the same peptides with the fully flexible kink (difference up  
80 to ~10 kT, Figure 1D). However, the effect of the kink is opposite in peptides forming TP, where  
81 fully flexible peptides have lower free energy than the peptides without the kink (difference of  
82 up to ~10 kT, Figure 2C). The peptide ability to adapt to the different geometry of BP and TP  
83 structures could explain these observations. The tightly-packed bundle of peptides in BP structures  
84 assumes a cylindrical shape (Figure 1A), whose packing becomes disrupted by the kink. TPs are  
85 more unstructured and peptides with the kink more easily conform to the curved shape of the pore  
86 catenoid.

87 Results from the phenomenological model were verified using the Martini model (35), by which  
88 the sequences of a few selected AMPs and their mutants were studied. To investigate the effect  
89 of the kink, two types of secondary structures were imposed on peptides: (1) fully helical and (2)

90 helical with a kink (for details, see the Methods section). In both cases, wild-type (WT) sequences as  
 91 well as single-point mutations of kink-forming residues were considered.

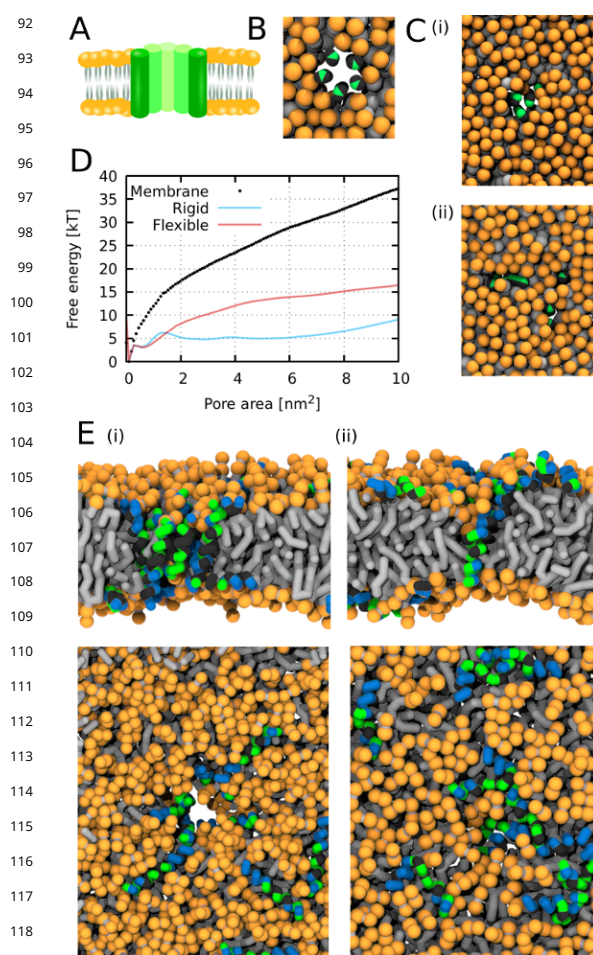

120 **Figure 1.** Flexible kink hinders formation of BPs. (A)  
 121 Schematic representation of BP model. (B) Simulation  
 122 snapshot of initial BP structure (*top view*) with our  
 123 phenomenological (O-PSC-NE) model. (C) Stability of BP  
 124 using peptides with (i) rigid and (ii) fully flexible kink (*top*  
 125 *view*). (D) Free energy profiles of pore formation at low  
 126 peptide concentration for peptides with and without  
 127 flexible kink show that peptides without kink lower free  
 128 energy for pore formation more than flexible ones  
 129 (O-PSC-NE, peptide length 5 nm, hydrophobicity 270°).  
 130 (E) Simulation snapshots from Martini simulations with  
 131 Buforin II peptides. (i) P11L mutation in Buforin II  
 132 peptides stabilizes formation of BP. (ii) P11G mutation  
 133 leads to destabilization of BP structure. Top snapshots  
 134 depict *cross-section view* of the membrane at the  
 135 position of the peptide aggregate. The bottom  
 136 snapshots depict *top view* of simulation systems. Color  
 137 coding: Hydrophobic residues = black, hydrophilic  
 138 residues = green, positively charged residues = blue,  
 139 lipid heads = orange, lipid tails = light gray.

Our simulations showed that Buforin II WT (38), with a proline kink in the middle, and its mutant with a glycine kink, P11G, were not able to stabilize BPs, and the pore closed in  $\sim 14 \mu\text{s}$ . In contrast, Buforin II WT\* (\* refers to the WT with a fixed helical structure) and its helical mutants P11L and P11A remained in the BP structure for the whole of the simulation ( $50 \mu\text{s}$ ). Snapshots from the end of simulations are depicted in Figure 1E), profiles of pore stability over time (water content in the pore) are in Figure S5 and Figure S6. A comparable pore stability was observed for systems with all considered lipid compositions (POPC, POPC:POPG (1:1), and POPC:POPS (1:1)), see Figure S5 and Table S3. However, the presence of the negatively charged lipids affected BP morphology, which deviated from its regular structure. The deviation was caused by the electrostatic interaction of positively charged residues on Buforin II peptides (charge +6 under physiological conditions), which oriented negatively charged lipid headgroups towards the membrane core (Figure 5D) and disrupted the ideal structure of the BP. For more details, see phosphate density profiles in Figure S13.

The stabilization of TP by peptides with a kink was validated using LL-37, which disrupts POPC membranes (Figure 2D(i)). (39) When a kink-forming glycine at position 14 (40) was kept in a helical conformation (WT\*) or the peptide was mutated to the helical G14L variant, the stability of TP was decreased and pore closure was observed at  $\sim 10 \mu\text{s}$  (Figure 2D(ii)). Note, however, that G14L mutant of LL-37 was still able to form transient pores (Figure S9). Similarly, WT Candidalysin peptides were capable of stabilizing small (with the minimum pore thickness of 0.5 nm) pores over the whole simulation run ( $26 \mu\text{s}$ ). When the proline at position 14 was prevented from disrupting the helical conformation, the preformed pores closed within  $5 \mu\text{s}$ .

The above findings from our Martini simulations are in full agreement with the free energy profiles and generic features predicted by our phenomenological models.

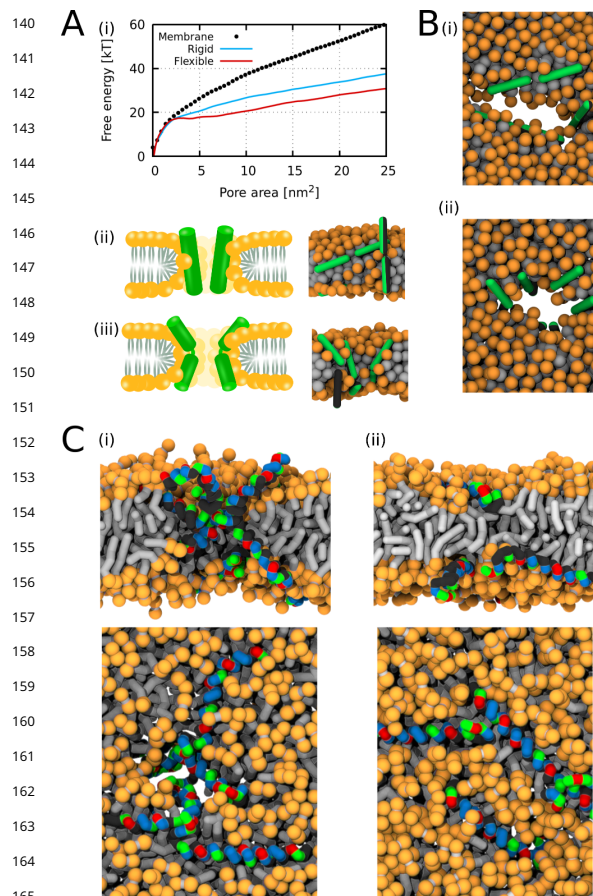

**Figure 2.** Flexible kink is favorable for formation of TPs. (A) (i) Free energy profiles of pore formation at low peptide concentration for peptides without versus fully flexible kink demonstrate that flexible peptides lower free energy more than those without kink. (PSC AE, peptide length 7nm, half-hydrophobic) Peptides (ii) without and (iii) with fully flexible kink being involved in formation of TP. Schematic representation (left) and simulation snapshots with our phenomenological (PSC-NE) models (right) are depicted. (B) Top view of membrane pores for peptides (i) without and (ii) with fully flexible kink. (C) Simulation snapshots from Martini simulations with LL-37 peptides. (i) WT LL-37 peptides stabilize TP in hourglass shape (ii) G14L mutation in LL-37 peptides leads to destabilization of preformed pores. The top snapshots depict a cross-section view of the membrane at the position of the peptide aggregate, and the bottom snapshots depict the top view of simulation systems. Color coding: Hydrophobic residues = black, hydrophilic residues = green, positively charged residues = blue, negatively charged residues = red, lipid heads = orange, lipid tails = light gray.

The observed effects of the kink on pore stability are in agreement with previous experiments. For example, BP-forming Alamethicin retains its pore-forming function with the rigidifying P14A and G11A, or P14A mutations. (41) An enhanced membrane permeabilization of the P11A and P11L mutants of Buforin II has already been experimentally demonstrated. (19; 38) Moreover, more flexible double mutants P11A/V12P and P11A/V15P of Buforin II had lower membrane permeabilization activity than the P11A and P11L mutants. (42) An enhanced formation of TP by helical peptides with a kink could explain the stronger partitioning of  $\alpha$ -helical peptides with an imperfect secondary structure (e.g., a kink in helical AMPs) into the membrane core observed in experiments. (43)

However, when introducing a proline/glycine kink into the peptide sequence, the change in the residue hydrophilicity should also be considered, which together with increased flexibility can alter the peptide adsorption to the membrane. The local concentration of peptides at the membrane could exceed the effect on pore (de)stabilization. Reduced adsorption was demonstrated, e.g., for Melittin mutants (L16G) with increased flexibility. (44) However, after compensating for the adsorption by the addition of negatively charged lipids, the mutant regained its permeabilization ability. (44) Unstructured proline was also suggested to enhance peptide translocation across the membrane (23; 24), but such an effect is beyond the scope of this study.

### Different Structures of Toroidal Pores are Influenced by the Kink Position

AMPs with an  $\alpha$ -helical kink are capable of driving the formation of structurally diverse TPs. Two TP structures with different orientations of peptides were observed in our simulations (Figure 3A(i),(ii)). The first is called 'U-shaped', inspired by the shape of the peptides, which adopt a bent conformation. The peptide stays on one leaflet with both termini in the headgroup region, and the kink is inserted deeply in the membrane. (45) Candidalysin peptides adopted such a structure in our simulations, see Figure 3B(i). The second TP structure was labeled as 'hourglass'. (46) The peptides span the membrane plane with the kink positioned in the middle. We found such a structure with LL-37 peptides in our simulations, which is in agreement



190 with experimental findings on LL-37 preferentially forming TPs with a perpendicular orientation. (39)  
 191 In our phenomenological model, we observed both structures of TP pores. U-shaped pores were  
 192 observed with peptides with a fully flexible kink, while hourglass pores were found with peptide  
 193 models with a fixed kink with an inner angle of 135° and 90°. These peptides had hydrophilic  
 194 end-caps and a length of 5.0 nm.

195 One of the differences between LL-37 and  
 196 Candidalysin peptides is the position of the  
 197 proline/glycine kink with respect to the hy-  
 198 drophobic patch. The Martini model with  
 199 highlighted proline shows that proline is posi-  
 200 tioned on the side of the hydrophobic patch  
 201 in Candidalysin (Figure 3B(i)), while the kink-  
 202 forming glycine residue in LL-37 peptides is  
 203 located on the side of the hydrophilic region  
 204 (Figure 3C(ii)). We created mutants that shift  
 205 the kink residue to the hydrophilic (Candi-  
 206 dalysin P14Q/Q15P mutant, Figure 3B(ii)) or  
 207 hydrophobic (LL-37 I13G/G14I mutant, Fig-  
 208 ure 3C(ii)) patch by rearranging two adja-  
 209 cent residues. MD simulation of the LL-37  
 210 I13G/G14I mutant showed the formation of  
 211 a U-shaped pore with two peptides adopt-  
 212 ing such a conformation. The pore was  
 213 stable for the duration of the simulation  
 214 ~30  $\mu$ s, see Figure S7- Figure S9. The Can-  
 215 didalysin P14Q/Q15P mutant switched from  
 216 a U-shaped TP to an hourglass-shaped TP  
 217 with perpendicular peptide orientation. The  
 218 hourglass arrangement of candidalysin pep-  
 219 tides appears to be less favorable, as the  
 220 pore got closed at the beginning of the sim-  
 221 ulation. Sometimes, small transient pores  
 222 (with thickness ~ 0.5 nm) appeared through-  
 223 out the simulation. Therefore, exchanging  
 224 the positions of two amino acid lead to a  
 225 change in TP structure from U- to Hourglass-  
 226 shaped for Candidalysin and from Hourglass-  
 227 to U-shaped for LL-37, respectively. The po-  
 228 sition of the kink-forming residue is thus the  
 229 key that can determine the structure of TPs.

230 The helix-kink-helix motif is considered to  
 231 be a motif within one peptide. However, two  
 232 different helical peptides can interact with  
 233 each other to form an analogical structure. It  
 234 has been suggested that a mixture of prop-  
 235 erly chosen AMPs could possess synergistic  
 236 interactions responsible for more efficient  
 237 pore formation. (47) In such a pore, one pep-  
 238 tide was found to be inserted in the trans-  
 239 membrane orientation (T-state), whereas the second peptide stayed adsorbed on the membrane  
 240 surface in parallel orientation (S-state). (47; 51) We observed the synergistic pores with our phe-

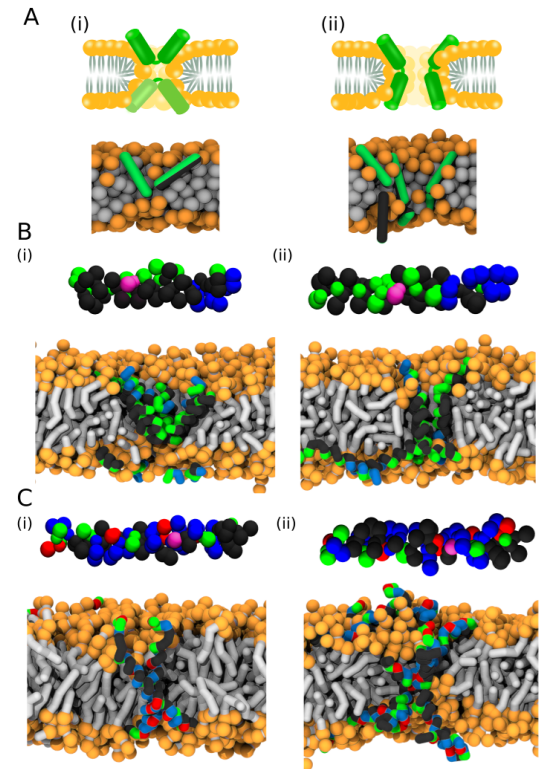

**Figure 3.** U- and Hourglass-shaped TP structures. (A) Schematic representation (*top*) and simulation snapshots with phenomenological (PSC-NE) models (*bottom*) of (i) U-shaped and (ii) Hourglass TP are depicted. (B) (i) WT Candidalysin peptides adopt U-shaped conformation in membrane core. Peptide model with highlighted proline residue (purple) is depicted. (ii) P14Q/Q15P mutant of Candidalysin (with shifted kink position) induces structural transitions from U- to Hourglass-shaped conformation. Peptide model with highlighted proline residue (purple) is depicted. (C) (i) WT LL-37 preferentially adopts Hourglass-shaped TP structure. Peptide model with highlighted glycine residue (purple) is depicted. (ii) I13G/G14I mutant of LL-37 with kink shifted to hydrophobic patch changes Hourglass-shaped pore structure to U-shaped one. Peptide model with highlighted glycine residue (purple) is depicted. Color coding: Hydrophobic residues = black, hydrophilic residues = green, positively charged residues = blue, negatively charged residues = red, lipid heads = orange, lipid tails = light gray, proline/glycine = purple.

241 nomenological model for long helices with a flexible kink connection (Figure 4A(ii)). Figure 4A(iii)  
 242 shows the pores formed by peptides with two connected helices, each 3.0 nm in length and with an  
 243 inner angle of 135° or 90°. The related free energy profiles show the pores formed more easily for  
 244 peptides with an angle of 135° compared to 90° (Figure 4A(i)).

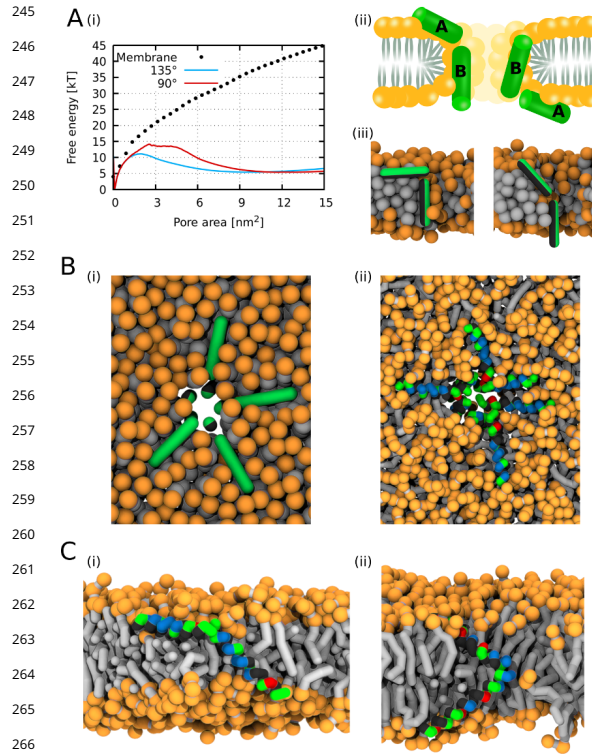

245 **Figure 4.** Surface-Transmembrane (ST) pore model. (A)  
 246 (i) Free energy profiles of our phenomenological model  
 247 with fixed kink (inner angle 135° using PSC-NE model  
 248 and inner angle 90° using PSC-AE model, peptide length  
 249 7.0 nm, half hydrophobic) show that peptides with  
 250 mutual alignment of 135° are more energetically  
 251 favorable, (ii) Schematic illustration of synergistic pore  
 252 with end-end interactions between peptides A and B,  
 253 (iii) Simulation snapshot from pore using  
 254 phenomenological models with  $\alpha = 90^\circ$  (left) and  
 255  $\alpha = 135^\circ$  (right). (B) (i) Phenomenological models  
 256 and (ii) Martini simulations with fully helical Magainin II  
 257 peptides exhibit analogical ST pore structure. (C) Side  
 258 view of (i) Magainin II peptides shows mutual  
 259 interactions between their N- and C-termini, whereas (ii)  
 260  $\delta$ -lysin peptides exert mutual interactions via their  
 261 C-termini. Color coding: Hydrophobic residues = black,  
 262 hydrophilic residues = green, positively charged  
 263 residues = blue, negatively charged residues = red, lipid  
 264 heads = orange, lipid tails = light gray.

PGLa and Magainin II are among the best-known AMPs of the Magainin family with synergistic effects. PGLa and Magainin II were found to interact via C-termini with PGLa inside the pore and Magainin II on the membrane surface (49; 47; 50; 51). In agreement with our phenomenological model, the peptides were aligned approximately 135° to each other. Another example of similarly behaving peptides are Magainin II peptides which were reported to form synergistic homomeric pores. (52) Our Martini simulations of Magainin II peptides resulted in pores with peptides interacting via N- C-termini and with an angle between peptides of approximately 135° (Figure 4B(ii), C(i)). Similar behavior was observed for  $\delta$ -lysin peptides (Figure 4C(ii)). However,  $\delta$ -lysin peptides interacted via C-termini, and the position of the contact between the peptides was in the middle of the membrane. Such a structure resembles the hourglass TP observed for peptides with the helix-kink-helix motif. The distribution of angles between peptides can be found in Figure S12. The above examples demonstrate the structural similarity of pores formed by peptides with a helix-kink-helix motif and peptides interacting via their termini (for pore stability see Figure S10 and Figure S11). Besides U-shaped and hourglass TP, there is also the structure of Surface-Transmembrane (ST) TP formed by PGLa and Magainin II peptides.

### Fluorescent Leakage Assays on Buforin II, LL-37, and their Mutants

Our simulations with both the phenomenological and Martini model revealed that peptide flexibility modulates the formation of BPs and TPs. To further validate our results, Buforin II and LL-37 peptides and their mutants were synthesized and tested using fluorescence leakage assays with LUVs (for details, see the Methods section). For Buforin II peptides, the largest leakage was observed for P11L, followed by a slightly less hydrophobic P11A variant (see Figure 5 A). Significantly lower leakage was found for Buforin II WT with a proline kink, and the lowest leakage was caused by P11G. This is in excellent agreement with the stability of pores in our simulations – Figure 5 C and previous experimental findings. (19; 32) Moreover, LL-37 peptides exhibited greater leakage for the WT than

291 for the G14L mutant, in agreement with the simulations. Together this confirms that the presence  
292 of a flexible kink hinders the formation of BPs but promotes TPs.

## 293 **Conclusions**

294 We investigated the effect of the proline/glycine kink in helical peptides in membranes using free  
295 energy calculations of pore formation with a phenomenological model and pore stability simulations  
296 with a more detailed Martini model employing specific peptide sequences. Our multiscale simulation  
297 approach supported by fluorescent leakage assays showed that the flexible peptide kink in the  
298 helical structure facilitated the formation of toroidal pores (TPs) but caused the instability of barrel  
299 pores (BPs).

300 We found that fully helical Buforin II mutants formed BPs, while the WT and glycine mutants  
301 with the kink in the middle did not. The formation of TPs was investigated on LL-37, Candidalysin,  
302  $\delta$ -lysin, and Magainin II peptides and their mutants. The presence of a proline/glycine kink was  
303 demonstrated to stabilize TP. The exact structure (Hourglass or U-shaped) was modulated by the  
304 position of the kink in the sequence. Moreover, we showed that a flexible connection between two  
305 helices could have the same effect as a kink. In other words, TPs can also be stabilized by helical  
306 peptides that strongly interact via termini, effectively forming a helix-kink-helix structure. Such ST  
307 pore structures were observed for Magainin II and  $\delta$ -lysin peptides.

308 This study provides a comprehensive molecular rationalization of the effect of a proline/glycine  
309 kink in helical peptides in the context of membrane pore formation. As most of well-studied AMPs  
310 form TPs, a design strategy involving inclusion and correct positioning of a kink-forming residue  
311 could yield more potent antimicrobial peptides or less toxic drug-carrying peptides.

## 312 **Materials and Methods**

### 313 **Computational Simulations**

314 Two conceptually distinct models with a different level of coarse-graining were employed. The  
315 first model was a phenomenological model of an  $\alpha$ -helix, parametrized as a spherocylinder with a  
316 hydrophobic patch. (28) With respect to the hemispherical end-caps, we distinguish two types of  
317 phenomenological model - (1) with attractive end-caps (PSC-AE) and (2) with non-attractive end-caps  
318 (PSC-NE). To be able to investigate the effect of the kink, we connected two spherocylinders in  
319 a peptide by a harmonic bond. The equilibrium length of the harmonic bond was equal to the  
320 spherocylinder diameter or zero, leading to PSC or O-PSC models, respectively. The model was  
321 developed to be compatible with the three-bead lipid model by Cooke and Deserno, (54) which is  
322 an implicit solvent model that captures the membrane elastic properties and phase transition of a  
323 lipid bilayer. Peptide parameters (length, hydrophobicity, and flexibility of kink) were systematically  
324 varied. The simulations were performed with the Monte Carlo method using the Metropolis  
325 algorithm implemented in our freely available code on [github.com/robertvacha/SC](https://github.com/robertvacha/SC). We used a  
326 prismatic unit cell of about  $17 \times 17 \times 30$  nm with periodic boundary conditions. The lipid bilayer was  
327 assembled in the XY-plane using 500 lipid molecules and kept at zero tension. After membrane  
328 equilibration, peptides were added to the system in a random spatial and orientational distribution.  
329 The concentration of peptides and lipids can be expressed as the Peptide-to-Lipid (P/L) ratio. Here,  
330 we simulated systems with P/L 1/250, 1/100, 1/50, and 1/25. We used a small peptide concentration  
331 to prevent the formation of multiple simultaneous large pores.

332 Free energy of pore formation was calculated using the Wang-Landau (WL) method. (55) In our  
333 simulations, the pore was defined as an area in a membrane plane without lipid tails (bin size of  
334  $0.09 \text{ nm}^2$ ). The area of the largest pore was selected as the reaction coordinate, which was previously  
335 shown to be suitable for the free energy calculations of pore formation. (29; 56) The free energy  
336 profiles for small pores, with an area less than  $2 \text{ nm}^2$  were obtained using the Boltzmann inversion  
337 of spontaneous pore distribution. For effective enhanced sampling of the configurational space,  
338 we employed multiple walkers, i.e. parallel run of several clients using the same Wang-Landau

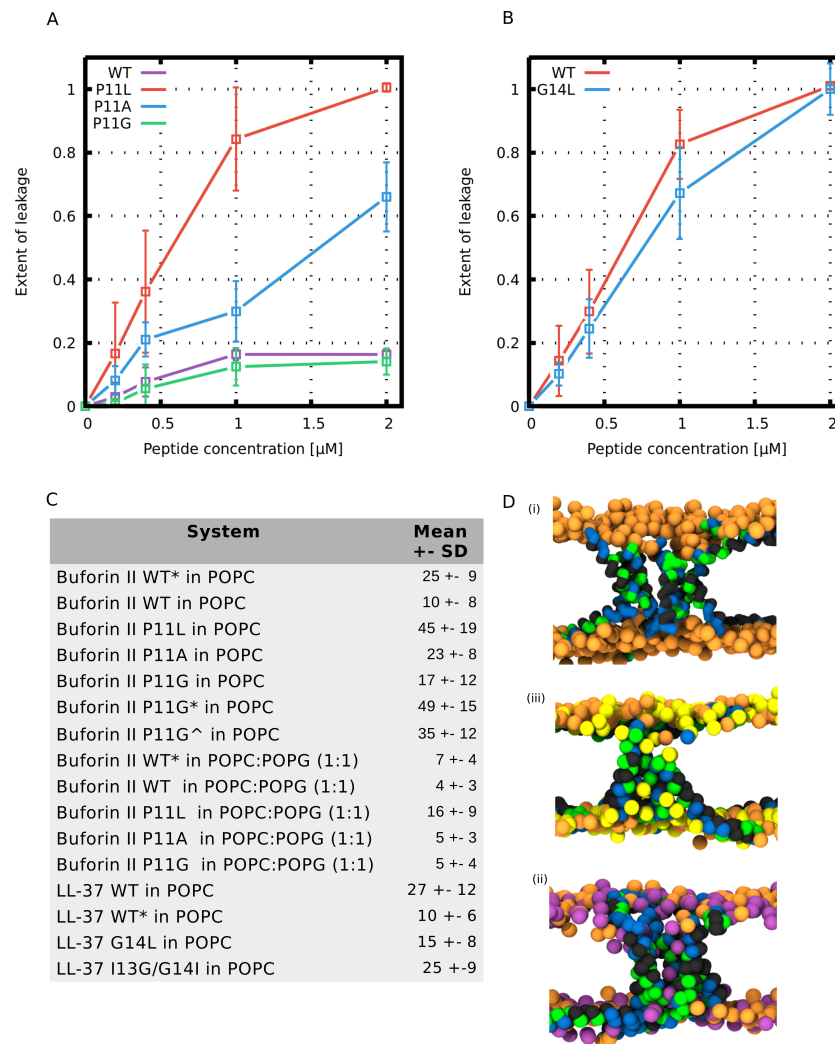

**Figure 5.** Membrane leakage induced by Buforin II and LL-37 peptides. (A) Fluorescence leakage assays of Buforin II peptides show that P11L mutants are the most effective, followed by helical but less hydrophobic P11A mutant. In contrast, peptides with a kink (higher flexibility), the wild-type and P11G mutant, exhibited a lower leakage of fluorescence dye. (B) Fluorescence leakage assays of LL-37 peptides show that G14L mutation slightly hindered membrane leakage, which corresponds to our Martini simulations. (C) Average number of water beads (each corresponding to four water molecules) in pore calculated from Martini simulations of Buforin II and LL-37 peptides. The last 10  $\mu\text{s}$  of simulation was analyzed, and the error is the standard deviation. For details on the models and systems (see Figure S5 and Figure S7). (D) Different lipid composition drives structural transitions from BP to TP structure. Martini snapshots show systems with (i) POPC lipids, (ii) POPC:POPG (1:1) lipids, and (iii) POPC:POPS(1:1) lipids. For the sake of simplicity, only phosphate groups of POPC (orange), POPG (purple), and POPS (yellow) lipids are depicted. Color coding: Hydrophobic residues = black, hydrophilic residues = green, positively charged residues = blue, phosphate groups of POPC lipids = orange, phosphate groups of POPG lipids = purple, phosphate groups of POPS lipids = yellow.



339 data. Each client started with different initial conditions comprising of randomly selected peptide  
340 configuration and membrane with a pre-formed pore of a certain size. The free energy profile  
341 was calculated for each of the 156 unique systems, employing several (up to 20) clients. Initial  $\alpha$   
342 value was set to  $10^{-3}$ . Calculations of free energy estimate were running unless  $\alpha$  value reached a  
343 pre-defined value of  $\sim 10^{-8}$ . In order to increase the precision of sampling, additional simulations  
344 with  $\alpha = 0$  were run. No artificial potential was added to the system during the  $\alpha = 0$  simulations, as  
345 only histogram was calculated and the free energy profiles were refined accordingly. Again, for the  
346 calculation of histogram, up to 10 clients with different initial conditions were employed.

347 *Martini Simulations:* The second model was a more detailed Martini coarse-grained model, where  
348 roughly four heavy atoms were combined into a single bead. (35) This explicit solvent model is  
349 not able to fold proteins, because the secondary structure has to be defined *a priori* and is kept  
350 throughout the simulations. We used the helical structure of peptides unless they contained a  
351 proline or glycine kink in the sequence. In such cases, we used two secondary structures: (1)  
352  $\alpha$ -helical with kink (modelled as a random coil) and (2) fully  $\alpha$ -helical for comparison (see Table 1).  
353 The membrane was composed of 500 1-palmitoyl-2-oleoyl-sn-glycero-3-phosphocholine (POPC)  
354 lipids. For comparison with experiments and to determine the effect of lipid composition, we also  
355 investigated lipid mixtures with negatively charged 1-palmitoyl-2-oleoyl-sn-glycero-3-phospho-L-  
356 serine (POPS) and 1-palmitoyl-2-oleoyl-sn-glycero-3-phosphoglycerol (POPG) lipids. The mixing  
357 ratios were POPC:POPG (1:1) and POPC:POPS (1:1).

358 The stabilization of the pore by peptides was investigated on preformed pores. First, peptides  
359 were placed into a fixed-size pore (maintained by zero box compressibility in the XY-plane). The  
360 system was equilibrated in order to obtain the preferred peptide orientation/arrangement. Based  
361 on the arrangement, we generated various starting conditions with different peptide arrangements  
362 (see Figure S1). The majority of the simulated peptides adopted one particular arrangement in a  
363 pore, regardless of the initial configuration used. The only exception was candidalysin peptides  
364 with a perpendicular starting configuration, as the peptides were probably unable to reorient into a  
365 U-shaped conformation. After additional equilibration, NpT production dynamics at a minimum  
366 length of 20  $\mu$ s were performed. Pore stability was evaluated using water density in the hydrophobic  
367 core along the membrane normal. The molecular dynamics simulations with the Martini model (35)  
368 were performed using the software package Gromacs 5.0.5.

369 *Molecular Dynamics protocol:* The initial configurations of peptides were constructed as  $\alpha$ -  
370 helical using Modeller 9.11. Peptide configurations were converted to coarse-grained repre-  
371 sentation by `martinize.py` script, provided by the authors of Martini force field (available at  
372 <https://github.com/cgmartini/martinize.py>). For helical proline, backbone angles and dihe-  
373 drals were set the same as for the other helical residues. Membrane structures were obtained via  
374 CHARMM-GUI. (63) Each membrane was composed of 500 lipids, distributed equally in both leaflets.  
375 Membrane pore was created by removing lipids in a defined radius from the center of membrane.  
376 Afterwards, peptides were placed into a preformed pore. Initial peptide arrangement in a preformed  
377 pore is depicted in Figure 6. Steric clashes between peptides and lipids were removed by geometry  
378 optimization using steepest descent algorithm. The obtained membrane-peptide configuration was  
379 solvated with increased van der Waals radii for both membrane and peptide beads to prevent the  
380 water insertion into the membrane hydrophobic core. After solvation, randomly selected water  
381 molecules were replaced by NaCl ions of 100 mM concentration. Excess of ions was used to the  
382 neutralize system net charge. The complete system was minimized again. Initial particle velocities  
383 were generated according to Maxwell distribution corresponding to 323 K. Leap-frog algorithm for  
384 integrating Newton's equations of motion was used. System temperature was kept at 323 K using  
385 velocity rescaling algorithm (64). Pressure was maintained via Berendsen thermostat at 1.0 bar  
386 with time coupling of 5 ps. Semiisotropic coupling scheme was employed. Compressibility was set  
387 to  $3 \cdot 10^{-4}$  bar<sup>-1</sup> in all directions. Verlet cutoff scheme was employed with radius 1.1 nm. Cutoff  
388 for both van der Waals and Coulomb interactions was set to 1.1 nm. Equilibration procedure was  
389 performed in five steps with different simulation times: (1) 0.5 ns (time step of 2 fs), (2) 1.25 ns



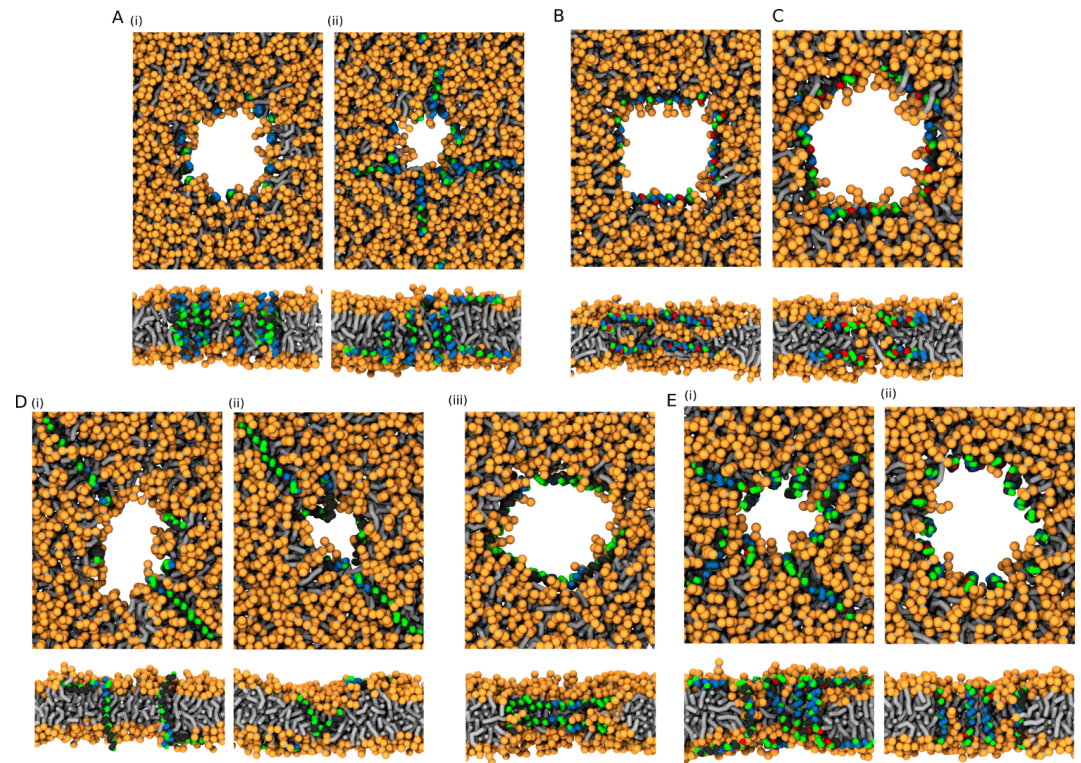

**Figure 6. Martini simulations - initial conditions.** Based on the preferred peptide orientation within membrane pore, couple of initial configuration were suggested and tested. (A) Buforin II peptides (i) 16 peptides oriented perpendicular to membrane plane with antiparallel arrangement in a pre-formed pore, (ii) 8 peptides oriented perpendicular to membrane plane with antiparallel arrangement in a pre-formed pore and 8 peptides being placed on membrane leaflets parallel to membrane, (B) 8 LL-37 peptides positioned parallel to membrane plane in pre-formed pore with double-belt pore arrangement, (C) 8 delta-lysin peptides being positioned parallel to membrane in pre-formed pore with double-belt pore arrangement, (D) Candidalysin peptides (i) 4 peptides placed in a pre-formed pore with perpendicular orientation to the membrane plane and 4 peptides on membrane surface oriented parallel to it, (ii) 4 peptides in a pre-formed pore in U-shaped conformation and 4 peptides on membrane, (iii) 8 peptides in the pore oriented parallel to the membrane plane - double-belt pore arrangement, (E) Magainin II peptides (i) 8 peptides in the pore with antiparallel mutual orientation perpendicular to the membrane plane and 8 peptides on membrane with parallel orientation to the membrane plane, and (ii) 16 peptides in the pore with antiparallel mutual orientation perpendicular to the membrane plane. Color coding: Hydrophobic residues = black, hydrophilic residues = green, positively charged residues = blue, negatively charged residues = red, lipid heads = orange, lipid tails = light gray.

## 396 Experiments

397 *Chemicals:* Phospholipids 1-palmitoyl-2-oleoyl-sn-glycero-3-phosphocholine (POPC) and 1-palmitoyl-  
 398 2-oleoyl-sn-glycero-3-[Phospho-rac-(1-glycerol) Sodium Salt (POPG) were obtained from Avanti  
 399 Lipids, Inc. (Alabaster, AL, USA). Both phospholipids were dissolved in chloroform; POPC in con-  
 400 centration 25.0 mg/ml (33 mM), POPG in concentration 10.0 mg/ml (13 mM). Lipid solutions were  
 401 stored at  $-20^{\circ}\text{C}$  before use. All peptides were synthesized by JPT Peptide Technologies GmbH (Berlin,  
 402 Germany). Peptides were dissolved to 1 mM concentration in phosphate-buffered saline (PBS).  
 403 The buffer composition was 25 mM NaPi ( $\text{NaH}_2\text{PO}_4 : \text{Na}_2\text{HPO}_4$  in ratio 3:7), 100 mM NaCl, 1 mM  
 404 EDTA, the pH was adjusted to physiological value 7.4. Sequence of Buforin II and LL-37 peptides  
 405 and tested variants is provided in Table Table 2.  $\text{NaH}_2\text{PO}_4 \cdot \text{H}_2\text{O}$ , NaOH, NaCl were obtained from  
 406 Merck (Darmstadt, Germany). Non-ionic surfactant Triton<sup>TM</sup> X-100 and fluorescent dye Calcein  
 407 were obtained from Sigma-Aldrich (St.Louis, MO USA). Chelating agent EDTA,  $\text{Na}_2\text{HPO}_4 \cdot 7\text{H}_2\text{O}$ , Chlo-  
 408 roform Spectronorm, Methanol technical were purchased from VWR (Solon, OH USA). The far-red  
 409 fluorescent, lipophilic carbocyanine DiI18(5) oil (DiD) were purchased from Life Technologies  
 410 Corporation (Eugene, Oregon USA). DiD oil was dissolved in chloroform and stored at  $-20^{\circ}\text{C}$ ; as 10  
 411 mM stock solution and 1 mM working solution.

**Table 2. Overview of Buforin II and LL-37 peptides (wild type and mutants) used in the fluorescence experiments.**

| Buforin II           | Sequence                             |
|----------------------|--------------------------------------|
| <b>Wild type</b>     | TRSSRAGLQFPVGRVHRLLRK                |
| <b>P11L mutation</b> | TRSSRAGLQFLVGRVHRLLRK                |
| <b>P11A mutation</b> | TRSSRAGLQFAVGRVHRLLRK                |
| <b>P11G mutation</b> | TRSSRAGLQFVGRVHRLLRK                 |
| LL-37                | Sequence                             |
| <b>Wild type</b>     | LLGDFFRKSKEKIGKEFKRIVQRIKDFLRNLPRTES |
| <b>G14L mutation</b> | LLGDFFRKSKEKILKEFKRIVQRIKDFLRNLPRTES |

412 *Leakage assay:* To study the pore formation of Buforin II mutants we employed large unilamellar  
 413 vesicles (LUV) filled with a self-quenching fluorescence dye, Calcein. After the pore formation  
 414 the dye leaks out and increase of fluorescence signal can be measured. To measure the same  
 415 phospholipid concentration in vesicle solution we labeled the lipid membranes with DiD dye which  
 416 enabled us to determine the lipid concentration fluorescently. After mixing the lipids with the  
 417 desired ratio POPC:POPG (1:1), we added DiD into the phospholipid mixture at ratio 1:500 (typically  
 418 2 nmol of DiD: 1  $\mu\text{mol}$  of phospholipids). Nonpolar solvent (chloroform) was evaporated inside  
 419 a fume hood. We rotated the glass vial in order to create a thin film over the glass wall. The  
 420 remaining chloroform was removed by leaving the open vials under vacuum over 2.5 hours. Lipid  
 421 films were hydrated with 0.5 ml Calcein buffer (self-quenching 35 mM Calcein, 25 mM NaPi, 20  
 422 mM NaCl, 1 mM EDTA; pH=7.4) and vortexed vigorously to bring all lipids in suspension. Such  
 423 solution contains multilamellar lipid vesicles (MLVs). (67) Subsequently, we performed five freeze-  
 424 thaw cycles at temperatures above the gel-liquid crystalline phase transition ( $-78.5^{\circ}\text{C}/2$  min and  
 425  $30^{\circ}\text{C}/0.5$  min) (69) Aging of vesicle suspension overnight prior to downsizing by extrusion makes  
 426 the sizing process easier and improves the homogeneity of the size distribution. LUVs were 50  
 427 times extruded through 100 nm polycarbonate filter membrane. (68) Unencapsulated Calcein was  
 428 separated from encapsulated material using HiTrap<sup>TM</sup> Desalting Columns 5x5ml (matrix is Sephadex  
 429 G-25 Superfine, cross-linked dextran). Fluorescence spectroscopy was performed with a HORIBA  
 430 Scientific Jobin Yvon FluoroLog-3 Modular Spectrofluorometer (New Jersey NJ USA) and interfaced to



431 a computer using FluorEssence™ V3.8. Excitation was set to 495 nm, emission to 520 nm. Excitation  
432 and emission slits were 0.25 mm and 1 mm, respectively. Peptides dissolved in a buffer (0.1 mM)  
433 were added to obtain the desired Peptide-to-Lipid (P/L) ratio. Finally, 50  $\mu$ l of nonionic surfactant  
434 Triton™ X-100 was added to lyse all remaining LUVs and determine the maximum fluorescence  
435 intensity.

### 436 Acknowledgement

437 AT, IK, TK, LS, and RV were supported by the Czech Science Foundation (grant 17-11571S) and the  
438 CEITEC 2020 (LQ1601) project with financial contribution made by the Ministry of Education, Youths  
439 and Sports of the Czech Republic within special support paid from the National Programme for  
440 Sustainability II funds. SP and MH acknowledge support by the Czech Science Foundation (via  
441 P208/12/G016). Computational resources were provided by the CESNET LM2015042 and the CERIT  
442 Scientific Cloud LM2015085, provided under the programme 'Projects of Large Research, Devel-  
443 opment, and Innovations Infrastructures'. This work was supported by The Ministry of Education,  
444 Youth and Sports from the Large Infrastructures for Research, Experimental Development and  
445 Innovations project 'IT4Innovations National Supercomputing Center – LM2015070'.

### 446 References

- 447 [1] Fosgerau K, Hoffmann T (2015) Peptide therapeutics: current status and future directions. *Drug Discov.*  
448 *Today*, 20(1): 122-128.
- 449 [2] Peters B-M, Shirliff M-E, Jabra-Rizk M-A (2010) Antimicrobial peptides: primeval molecules or future drugs?  
450 *PLoS Pathog.*, 6(10): e1001067.
- 451 [3] Gaspar D, Veiga A-S, Castanho A-R-B-M (2013) From antimicrobial to anticancer peptides. A review. *Front*  
452 *Microbiol.*, 4: 294.
- 453 [4] Falco A, Ortega-Villaizan M, Chico V, Brocal I, Perez L, Coll J-M, Estepa A (2009) Antimicrobial peptides as  
454 model molecules for the development of novel antiviral agents in aquaculture. *Mini-Rev Med. Chem.*, 9(10):  
455 1159-1164.
- 456 [5] Hoskin D-W, Ayyalusamy R (2008) Studies on anticancer activities of antimicrobial peptides. *Biochim. Biophys.*  
457 *Acta*, 1778(2): 357-375.
- 458 [6] Pollard H-B, Arispe N, Rojas E (1995) Ion channel hypothesis for Alzheimer amyloid peptide neurotoxicity.  
459 *Cell Mol. Neurobiol.*, 15(5): 513-526.
- 460 [7] Sengupta D, Leontiadou H, Mark A-E, Marrink S-J (2008) Toroidal pores formed by antimicrobial peptides  
461 show significant disorder. *Biochim. Biophys. Acta*, 1778(10): 2308-2317.
- 462 [8] Wimley W-C (2010) Describing the mechanism of antimicrobial peptide action with the interfacial activity  
463 model. *ACS Chem. Biol.*, 5(10): 905-917.
- 464 [9] Chen Y, Mant C-T, Farmer S-W, Hancock R-E, Vasil M-L, Hodges R-S (2005) Rational design of  $\alpha$ -helical  
465 antimicrobial peptides with enhanced activities and specificity/therapeutic index. *J. Biol. Chem.*, 280(13):  
466 12316-12329.
- 467 [10] Dathe M, Wieprecht T (1999) Structural features of helical antimicrobial peptides: their potential to  
468 modulate activity on model membranes and biological cells. *Biochim. Biophys. Acta*, 1462(1): 71-87.
- 469 [11] Kozic M, Fox S-J, Thomas J-M, Verma C-S, Rigden D-J (2018) Large scale ab initio modelling of structurally  
470 uncharacterized antimicrobial peptides reveals known and novel folds. *Proteins: Struct., Funct., Bioinf.*, 9(9):  
471 736-744.
- 472 [12] Vanhoof G, Goossens F-D-M-I-H-D-S, De Meester I, Hendriks D, vScharpe S (1995) Proline motifs in peptides  
473 and their biological processing. *FASEB J.*, 9(9): 736-744.
- 474 [13] Lee J-K, Gopal R, Park S-C, Ko H-S, Kim Y, Hahm K-S, Park Y (2013). A proline-hinge alters the characteristics  
475 of the amphipathic  $\alpha$ -helical AMPs. *PLoS one*, 8(7), e67597.

- 476 [14] Xiao Y, Herrera A-I, Bommineni Y-R, Soulages J-L, Prakash O, Zhang G (2009) The central kink region of  
477 fowlicidin-2, an  $\alpha$ -helical host defense peptide, is critically involved in bacterial killing and endotoxin  
478 neutralization. *J. Innate Immun.*, 1(3): 268-280.
- 479 [15] Suh J-Y, Lee Y-T, Park C-B, Lee K-H, Kim S-C, Choi B-S (1999) Structural and functional implications of a  
480 proline residue in the antimicrobial peptide gaegurin. *FEBS J.*, 266(2): 665-674.
- 481 [16] Lim S-S, Kim Y, Park Y, Kim J-I, Park I-S, Hahn K-S, Shin S-Y (2005) The role of the central I- or d-Pro residue  
482 on structure and mode of action of a cell-selective  $\alpha$ -helical IsCT-derived antimicrobial peptide. *Biochem.*  
483 *Biophys. Res. Commun.*, 334(4): 1329-1335.
- 484 [17] Shin S-Y, Yang S-T, Park E-J, Eom S-H, Song W-K, Kim J-I, Kim Y (2001) Antibacterial, antitumor and hemolytic  
485 activities of  $\alpha$ -helical antibiotic peptide, P18 and its analogs. *Chem. Bio. Drug Des.*, 58(6): 504-514.
- 486 [18] Suh J-Y, Lee K-H, Chi S-W, Hong S-Y, Choi B-W, Moon H-M, Choi B-S (1996) Unusually stable helical kink in  
487 the antimicrobial peptide - derivative of gaegurin. *FEBS Lett.*, 392(3): 309-312.
- 488 [19] Kobayashi S, Takeshima K, Park C-B, Kim S-C, Matsuzaki K (2000) Interactions of the novel antimicrobial  
489 peptide buforin 2 with lipid bilayers: proline as a translocation promoting factor. *Biochemistry*, 39(29):  
490 8648-8654.
- 491 [20] Tieleman D-P, Shrivastava I-H, Ulmschneider M-R, Sansom M-S (2001) Proline-induced hinges in transmem-  
492 brane helices: possible roles in ion channel gating. *Proteins: Struct., Funct., Bioinf.*, 44(2): 63-72.
- 493 [21] Rodriguez A, Villegas E, Montoya-Rosales A, Rivas-Santiago B, Corzo G (2014) Characterization of antibac-  
494 terial and hemolytic activity of synthetic pandinin 2 variants and their inhibition against Mycobacterium  
495 tuberculosis. *PloS one*, 9(7): e101742.
- 496 [22] Corzo G, Escoubas P, Villegas E, Barnham K-J, He W, Norton R-S, Nakajima T (2001) Characterization of  
497 unique amphipathic antimicrobial peptides from venom of the scorpion *Pandinus imperator*. *Biochem. J.*,  
498 359(1): 35-45.
- 499 [23] Vermeer L-S, Lan Y, Abbate V, Ruh E, Bui T-T, Wilkinson L-J, Kanno T, Jumagulova E, Kozłowska J, Patel J,  
500 McLntyre C-A, Yam W-C, Siu G, Atkinson R-A, Lam K-W, Bansal S-S, Drake A-F, Mitchell G-H, Mason A-J (2012)  
501 Conformational flexibility determines selectivity and antibacterial, antiplasmodial, and anticancer potency  
502 of cationic  $\alpha$ -helical peptides. *J. Biol. Chem.*, 287(41), 34120-34133.
- 503 [24] Amos S-B-T-A, Vermeer L-S, Ferguson P-M, Kozłowska J, Davy M, Bui T-T, Drake A-F, Lorenz C-L, Mason A-J  
504 (2016) Antimicrobial Peptide Potency is Facilitated by Greater Conformational Flexibility when Binding to  
505 Gram-negative Bacterial Inner Membranes. *Sci. Rep.*, 6, 37639.
- 506 [25] Park S-H, Kim H-E, Kim C-M, Yun H-J, Choi E-C, Lee B-J (2002) Role of proline, cysteine and a disulphide  
507 bridge in the structure and activity of the anti-microbial peptide gaegurin 5. *Biochem. J.*, 368(Pt1): 171.
- 508 [26] Gehman J-D, Luc F, Hall K, Lee T-H, Boland M-P, Pukala T-L, Separovic F (2008) Effect of antimicrobial peptides  
509 from Australian tree frogs on anionic phospholipid membranes. *Biochemistry*, 47(33):8557-8565.
- 510 [27] Liu L, Fang Y, Huang Q, Wu J (2011) A rigidity-enhanced antimicrobial activity: a case for linear cationic  
511  $\alpha$ -helical peptide HP (2-0) and its four analogues. *PloS one*, 6(1), e16441.
- 512 [28] Vácha R, Frenkel D (2014) Stability of Bicelles: A Simulation Study. *Langmuir*, 30(15): 4229-4235.
- 513 [29] Kabelka, I., Vácha, R. (2015). Optimal conditions for opening of membrane pore by amphiphilic peptides. *J.*  
514 *Chem. Phys.*, 143(24), 243115.
- 515 [30] Matsuzaki K, Sugishita K, Fujii N, Miyajima K (1995) Molecular basis for membrane selectivity of an anti-  
516 microbial peptide, magainin 2. *Biochemistry*, 34(10): 3423-3429.
- 517 [31] Turner J, Cho Y, Dinh N-N, Waring A-J, Lehrer R-I (1998) Activities of LL-37, a cathelin-associated antimicrobial  
518 peptide of human neutrophils. *Antimicrob. Agents Chemother.*, 42(9): 2206-2214.
- 519 [32] Park C-B, Kim H-S, Kim S-C (1998) Mechanism of action of the antimicrobial peptide buforin II: buforin II kills  
520 microorganisms by penetrating the cell membrane and inhibiting cellular functions. *Biochem. Biophys. Res.*  
521 *Commun.* 244(1): 253-257.
- 522 [33] Janzon L, Löfdahl S, Arvidson S (1989) Identification and nucleotide sequence of the delta-lysin gene, hld,  
523 adjacent to the accessory gene regulator (agr) of *Staphylococcus aureus*. *Mol. Gen. Genet.*, 219(3): 480-485.

- 524 [34] Moyes D-L, Wilson D, Richardson J-P, Mogavero S, Tang S-X, Wernecke J, Murciano C (2016) Candidalysin is a  
525 fungal peptide toxin critical for mucosal infection. *Nature*, 532(7597): 64.
- 526 [35] Monticelli L, Kandasamy S-K, Periole X, Larson R-G, Tieleman D-P, Marrink S-J (2008) The MARTINI coarse-  
527 grained force field: extension to proteins. *J. Chem. Theory Comput.*, 4(5): 819-834.
- 528 [36] Gregoria I, Deserno M (2008) Coarse-grained simulation studies of peptide-induced pore formation. *Biophys.*  
529 *J.*, 95(9): 4163-4173.
- 530 [37] Vácha R, Frenkel D (2013) Simulations suggest possible novel membrane pore structure. *Langmuir*, 30(5):  
531 1304-1310.
- 532 [38] Park C-B, Yi K-S, Matsuzaki K, Kim M-S, Kim S-C (2000) Structure-activity analysis of buforin II, a histone  
533 H2A-derived antimicrobial peptide: the proline hinge is responsible for the cell-penetrating ability of  
534 buforin II. *Proc. Natl. Acad. Sci. USA*, 97(15): 8245-8250.
- 535 [39] Lee C-C, Sun Y, Qian S, Huang H-W (2011) Transmembrane pores formed by human antimicrobial peptide  
536 LL-37. *Biophys. J.*, 100(7): 1688-1696.
- 537 [40] Xhindoli D, Pacor S, Benincasa M, Scocchi M, Gennaro R, Tossi A (2016) The human cathelicidin LL-37—A  
538 pore-forming antibacterial peptide and host-cell modulator. *Biochim. Biophys. Acta.*, 1858(3): 546-566.
- 539 [41] Jacob J, Duclouhier H, Cafiso D-S (1999) The role of proline and glycine in determining the backbone flexibility  
540 of a channel-forming peptide. *Biophys. J.*, 76(3), 1367-1376.
- 541 [42] Xie Y, Fleming E, Chen J-L, Elmore D-E (2011) Effect of proline position on the antimicrobial mechanism of  
542 buforin II. *Peptides*, 32(4), 677-682.
- 543 [43] Henderson J-M, Waring A-J, Separovi F, Lee K-Y-C (2016) Antimicrobial peptides share a common interaction  
544 driven by membrane line tension reduction. *Biophys. J.*, 111(10):2176-2189.
- 545 [44] Krauson A-J, Hall O-M, Fuselier T, Starr C-G, Kauffman W-B, Wimley W-C (2015) Conformational fine-tuning  
546 of pore-forming peptide potency and selectivity. *J. Am. Chem. Soc.*, 137(51), 16144-16152.
- 547 [45] Kolattukudy S-P, Berkowitz P-M-L (2012) Difference between magainin-2 and melittin assemblies in phos-  
548 phatidylcholine bilayers: results from coarse-grained simulations. *J. Phys. Chem. B*, 116(9): 3021-3030.
- 549 [46] Jung J-S, Preston G-M, Smith B-L, Guggino W-B, Agre P (1994) Molecular structure of the water channel  
550 through aquaporin CHIP. The hourglass model. *J. Biol. Chem.*, 269(20): 14648-14654.
- 551 [47] Salnikov E-S, Bechinger B (2011) Lipid-controlled peptide topology and interactions in bilayers: structural  
552 insights into the synergistic enhancement of the antimicrobial activities of PGLa and magainin 2. *Biophys. J.*,  
553 100(6):1473-1480.
- 554 [48] Yeh I-C, Olson M-A, Lee M-S, Wallqvist A (2008) Free-energy profiles of membrane insertion of the m2  
555 transmembrane peptide from influenza A virus. *Biophys. J.*, 95(11): 5021-5029.
- 556 [49] Westerhoff H-V, Zasloff M, Rosner J L, Hendler R-W, Waal A, Gomes A-V, Juretić D. (1995) Functional  
557 Synergism of the Magainins PGLa and Magainin-2 in *Escherichia coli*, Tumor Cells and Liposomes. *FEBS J.*,  
558 228(2):257-264.
- 559 [50] Matsuzaki K, Mitani Y, Akada K-Y, Murase O, Yoneyama S, Zasloff M, Miyajima K (1998) Mechanism of  
560 synergism between antimicrobial peptides magainin 2 and PGLa. *Biochemistry*, 37(43):15144-15153.
- 561 [51] Strandberg E, Horn D, Reißer S, Zerweck J, Wadhvani P, Ulrich A-S (2016) 2H-NMR and MD simulations reveal  
562 membrane-bound conformation of magainin 2 and its synergy with PGLa. *Biophys. J.*, 111(10):2149-2161.
- 563 [52] Wakamatsu K, Takeda A, Tachi T, Matsuzaki K (2002) Dimer structure of magainin 2 bound to phospholipid  
564 vesicles. *Biopolymers*, 64(6): 314-327
- 565 [53] Cheraghi N, Hosseini M, Mohammadinejad S (2018) Pore formation and the key factors in antibacterial  
566 activity of aurein 1.2 and LLAA inside lipid bilayers, a molecular dynamics study. *Biochim. Biophys. Acta*,  
567 1860(2):347-356.
- 568 [54] Cooke, I. R., Deserno, M. (2005) Solvent-free model for self-assembling fluid bilayer membranes: stabiliza-  
569 tion of the fluid phase based on broad attractive tail potentials. *J. Chem. Phys.*, 123(22), 224710.

- 570 [55] Wang F, Landau D P (2001) Efficient, multiple-range random walk algorithm to calculate the density of  
571 states. *Phys. Rev. Lett.*, 86(10), 2050.
- 572 [56] Wang Z-J, Frenkel D (2005) Pore nucleation in mechanically stretched bilayer membranes. *J. Chem. Phys.*,  
573 123(15), 154701.
- 574 [57] Wimley W C, White S H (1996) Experimentally determined hydrophobicity scale for proteins at membrane  
575 interfaces. *Nat. Struct. Mol. Biol.*, 3(10), 842.
- 576 [58] Arias M, Prenner E J, Vogel H J (2017) Calorimetry Methods to Study Membrane Interactions and Perturba-  
577 tions Induced by Antimicrobial Host Defense Peptides. *Antimicrobial Peptides*, 119-140.
- 578 [59] Mayer L-D, Hope M-J, Cullis P-R, Janoff A-S (1985) Solute distributions and trapping efficiencies observed in  
579 freeze-thawed multilamellar vesicles. *Biochim. Biophys. Acta*, 817(1), 193-196.
- 580 [60] Nayar R, Hope M-J, Cullis P-R (1989) Generation of large unilamellar vesicles from long-chain saturated  
581 phosphatidylcholines by extrusion technique. *Biochim. Biophys. Acta*, 986(2), 200-206.
- 582 [61] Braun S, Pokorná Š, Šachl R, Hof M, Heerklotz H, Hoernke M (2017) Biomembrane Permeabilization:  
583 Statistics of Individual Leakage Events Harmonize the Interpretation of Vesicle Leakage. *ACS nano*.
- 584 [62] Lidman M, Pokorná Š, Dingeldein A P G, Sparrman T, Wallgrend M, Šachl R, Hof M, Gröbner G (2016) The  
585 oxidized phospholipid PazePC promotes permeabilization of mitochondrial membranes by Bax. *Biochim.*  
586 *Biophys. Acta*, 858(6), 1288-1297.
- 587 [63] Jo S, Kim T, Iyer V-G, Im W (2008) CHARMM-GUI: a web-based graphical user interface for CHARMM. *J.*  
588 *Comput. Chem.*, 29(11), 1859-1865.
- 589 [64] Bussi, G., Donadio, D., Parrinello, M. (2007). Canonical sampling through velocity rescaling. *J Chem Phys* ,  
590 126(1), 014101.
- 591 [65] Parrinello M, Rahman A. (1981) Polymorphic transitions in single crystals: A new molecular dynamics  
592 method. *J. Appl. Phys.*, 52(12), 7182-7190.
- 593 [66] Moyes D-L, Wilson D, Richardson J-P, Mogavero S, Tang S-X, Wernecke J, Murciano C (2016) Candidalysin is a  
594 fungal peptide toxin critical for mucosal infection. *Nature*, 532(7597): 64.
- 595 [67] Arias M, Prenner E J, Vogel H J (2017) Calorimetry Methods to Study Membrane Interactions and Perturba-  
596 tions Induced by Antimicrobial Host Defense Peptides. *Antimicrobial Peptides*, 119-140.
- 597 [68] Mayer L-D, Hope M-J, Cullis P-R, Janoff A-S (1985) Solute distributions and trapping efficiencies observed in  
598 freeze-thawed multilamellar vesicles. *Biochim Biophys Acta*, 817(1), 193-196.
- 599 [69] Nayar R, Hope M-J, Cullis P-R (1989) Generation of large unilamellar vesicles from long-chain saturated  
600 phosphatidylcholines by extrusion technique. *Biochim Biophys Acta*, 986(2), 200-206.



601 **Supplementary Material**

**Table S1. Combination of parameters for O-PSC-NE model peptides with *fixed* and *flexible* kink.** Effect of peptide length (4.0, 5.0, or 7.0 nm), width of hydrophobic patch (150°, 190°, 180°, 230°, 270°, 310°, 350°), on the formation of different pore structures is depicted. TP stands for toroidal pore (without any more closely specified structure, see example in Figure S1), BP for barrel-stave pore, ST for surface-transmembrane pore, X for no binding to the membrane, I/A for peptide insertion to the membrane but no peptide aggregation inside the membrane, S/A for aggregation of peptides in solvent, and DTP for disordered toroidal pore structure, see example in Figure S2.

|                 | flexible | rigid | flexible | rigid | flexible | rigid | flexible | rigid | flexible | rigid | flexible | rigid |
|-----------------|----------|-------|----------|-------|----------|-------|----------|-------|----------|-------|----------|-------|
| patch width [°] | 150      |       | 190      |       | 230      |       | 270      |       | 310      |       | 350      |       |
| length [nm]     |          |       |          |       |          |       |          |       |          |       |          |       |
| 4.0             | x        | x     | x        | x     | x        | x     | x        | x     | x        | BP    | I/A      | I/A   |
| 5.0             | x        | x     | x        | x     | x        | x     | TP       | BP    | I/A      | BP    | I/A      | I/A   |
| 7.0             | TP       | S/A   | TP       | TP    | TP       | DTP   | I/A      | DTP   | I/A      | I/A   | I/A      | I/A   |

**Table S2. Combination of parameters for PSC-NE and PSC-AE model peptides with *fixed* and *flexible* kink.** Effect of peptide length (4.0, 5.0, or 7.0 nm), width of hydrophobic patch (180°), and attractiveness of end-caps (PSC-NE or PSC-AE) on the formation of different pore structures is depicted. TP stands for toroidal pore (without any more closely specified structure, see example in Figure S1), U for U-shaped pore, HG for hourglass pore, BP for barrel-stave pore, ST for surface-transmembrane pore, and DTP for disordered toroidal pore structure, see example in Figure S2.

| width [°] | PSC-AE with <i>fixed</i> kink |     |     | PSC-NE with <i>fixed</i> kink |     |     |
|-----------|-------------------------------|-----|-----|-------------------------------|-----|-----|
|           | length [nm]                   |     |     | length [nm]                   |     |     |
|           | 4.0                           | 5.0 | 7.0 | 4.0                           | 5.0 | 7.0 |
| 180       | TP                            | TP  | TP  | DTP                           | TP  | TP  |

  

| width [°] | PSC-AE with <i>flexible</i> kink |     |       | PSC-NE with <i>flexible</i> kink |      |     |
|-----------|----------------------------------|-----|-------|----------------------------------|------|-----|
|           | length [nm]                      |     |       | length [nm]                      |      |     |
|           | 4.0                              | 5.0 | 7.0   | 4.0                              | 5.0  | 7.0 |
| 180       | TP                               | TP  | TP/HG | TP                               | U/HG | U   |

**Table S3. Average number of solvent molecules in the region from ~ -0.9 to 0.9 nm from membrane center in the last 10  $\mu$ s.** Note that WT\* stands for wild-type sequence where kink-forming residue was forced to be  $\alpha$ -helical. In case of Buforin II P11G<sup>^</sup>, only single coil in mutated glycine position has been used as a definition of secondary structure.

| System                               | Mean number | Standard Deviation |
|--------------------------------------|-------------|--------------------|
| POPC                                 | 0.7         | 1.1                |
| LL-37 WT in POPC                     | 27.4        | 11.9               |
| LL-37 WT* in POPC                    | 9.8         | 6.1                |
| LL-37 G14L in POPC                   | 15.3        | 7.8                |
| LL-37 I13G/G14I in POPC              | 24.6        | 8.6                |
| Buforin II WT* in POPC               | 27.6        | 10.3               |
| Buforin II WT in POPC                | 10.5        | 7.6                |
| Buforin II P11L in POPC              | 43.7        | 17.8               |
| Buforin II P11A in POPC              | 23.1        | 8.6                |
| Buforin II P11G in POPC              | 7.7         | 6.0                |
| Buforin II P11G <sup>^</sup> in POPC | 20.0        | 14.8               |
| Buforin II P11G* in POPC             | 21.4        | 7.4                |
| Buforin II WT* in POPC:POPG (1:1)    | 6.0         | 3.6                |
| Buforin II WT in POPC:POPG (1:1)     | 4.0         | 3.2                |
| Buforin II P11L in POPC:POPG (1:1)   | 14.9        | 8.0                |
| Buforin II P11A in POPC:POPG (1:1)   | 5.3         | 3.6                |
| Buforin II P11G in POPC:POPG (1:1)   | 3.7         | 3.2                |
| Buforin II WT* in POPC:POPS (1:1)    | 7.8         | 4.0                |
| Buforin II WT in POPC:POPS (1:1)     | 3.8         | 3.0                |
| Buforin II P11L in POPC:POPS (1:1)   | 5.4         | 3.6                |
| Buforin II P11A in POPC:POPS (1:1)   | 7.7         | 4.9                |
| Buforin II P11G in POPC:POPS (1:1)   | 3.9         | 3.3                |
| Magainin II WT* in POPC              | 30.1        | 8.9                |
| Magainin II WT in POPC               | 16.1        | 6.8                |
| Magainin II G13P* in POPC            | 45.3        | 11.5               |
| Magainin II G13P in POPC             | 60.3        | 18.8               |
| $\delta$ -lysin WT* in POPC          | 12.4        | 5.7                |
| $\delta$ -lysin WT in POPC           | 15.8        | 6.8                |
| CandK WT* in POPC                    | 6.0         | 4.3                |
| CandK WT in POPC                     | 6.9         | 3.4                |
| CandKR WT in POPC                    | 7.1         | 4.2                |
| CandKR P14Q/Q15P in POPC             | 6.6         | 4.5                |

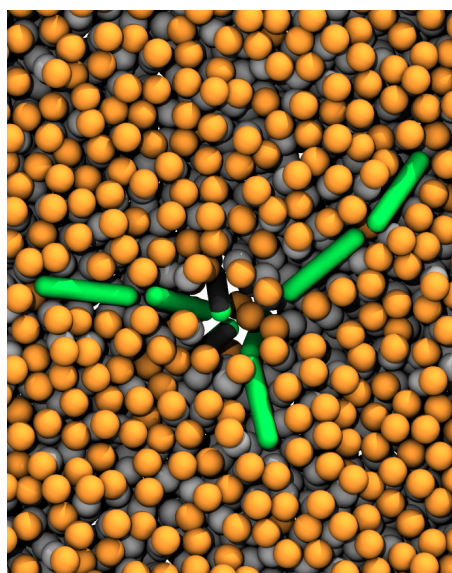

**Figure S1. Example of toroidal pore with phenomenological models.** Snapshot shows that some peptides (PSC-AE model) adopt ST pore structure, while the other assume rather HG pore structure or stay adsorbed in the vicinity of pore rim. Such pores are therefore considered as toroidal pores (labeled as TP in above Tables).

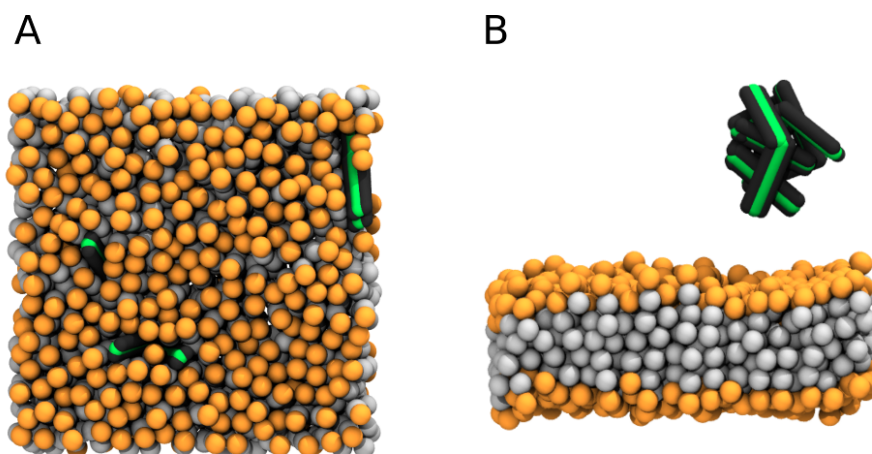

**Figure S2. Example of systems with phenomenological models with disordered toroidal pore structure.** (A) Rigid O-PSC-NE with 7.0 nm length and  $310^\circ$  (*top view*) insert into membrane independent of each other. (B) Flexible O-PSC-NE with 7.0 nm length and  $310^\circ$  (*side view*) form clusters in the surrounding solvent preferably. Such systems were labeled as DTP in above Tables.

## PSC-AE

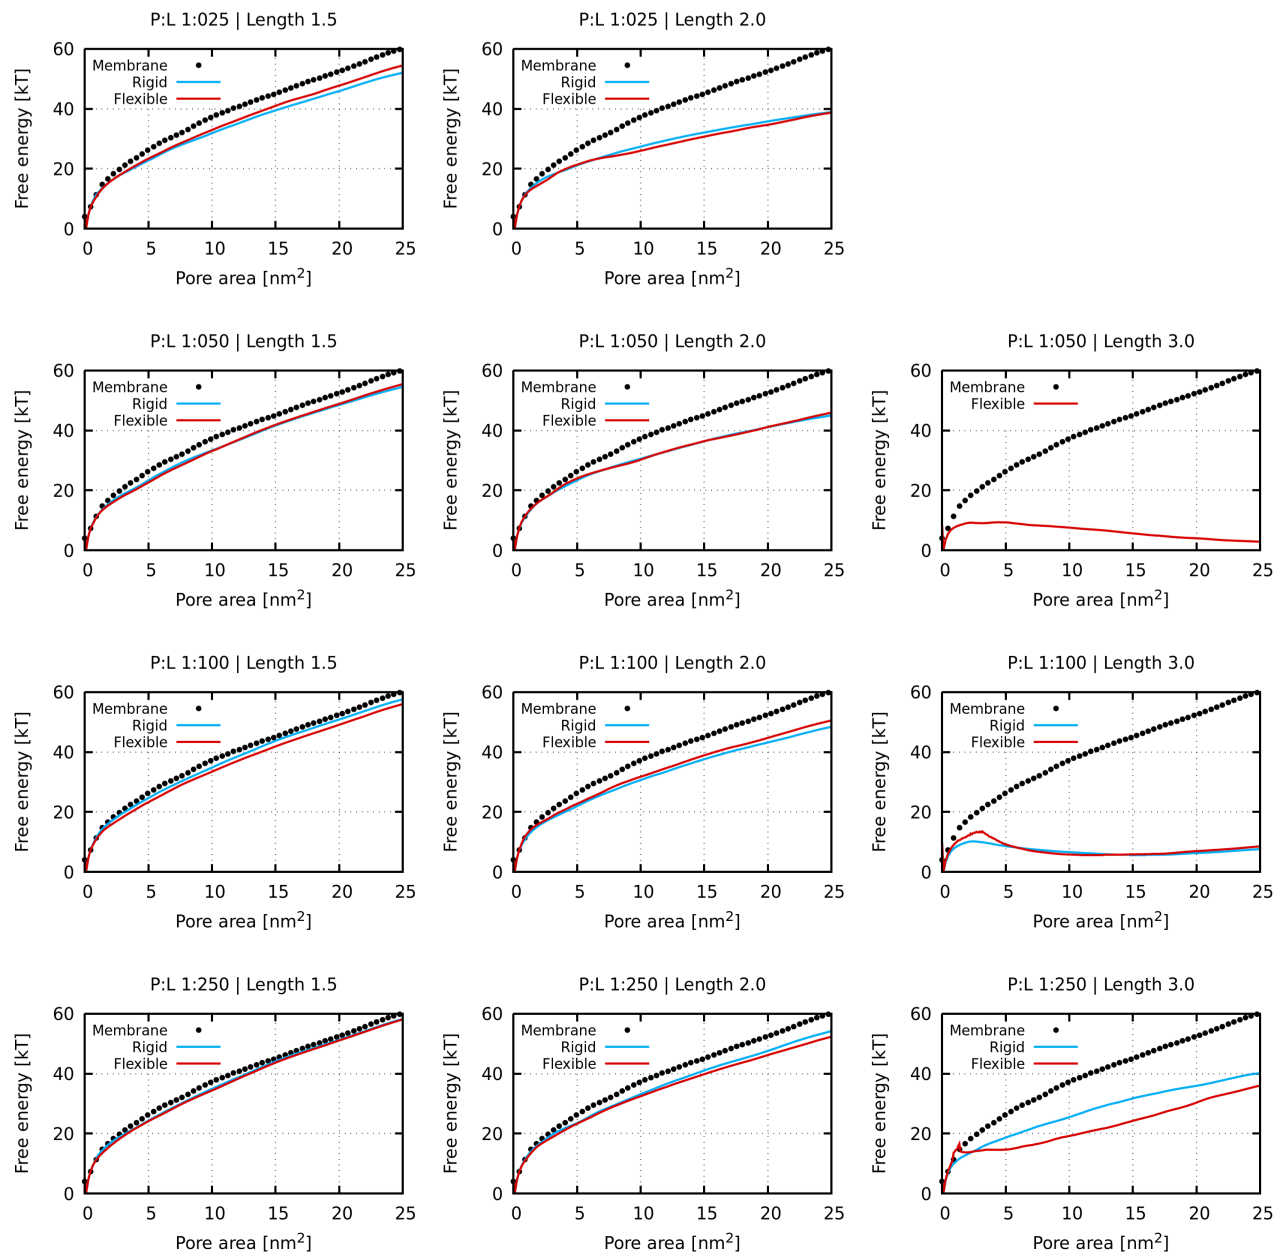

Figure S3. Free energy profiles for PSC-AE model peptides.



## PSC-NE

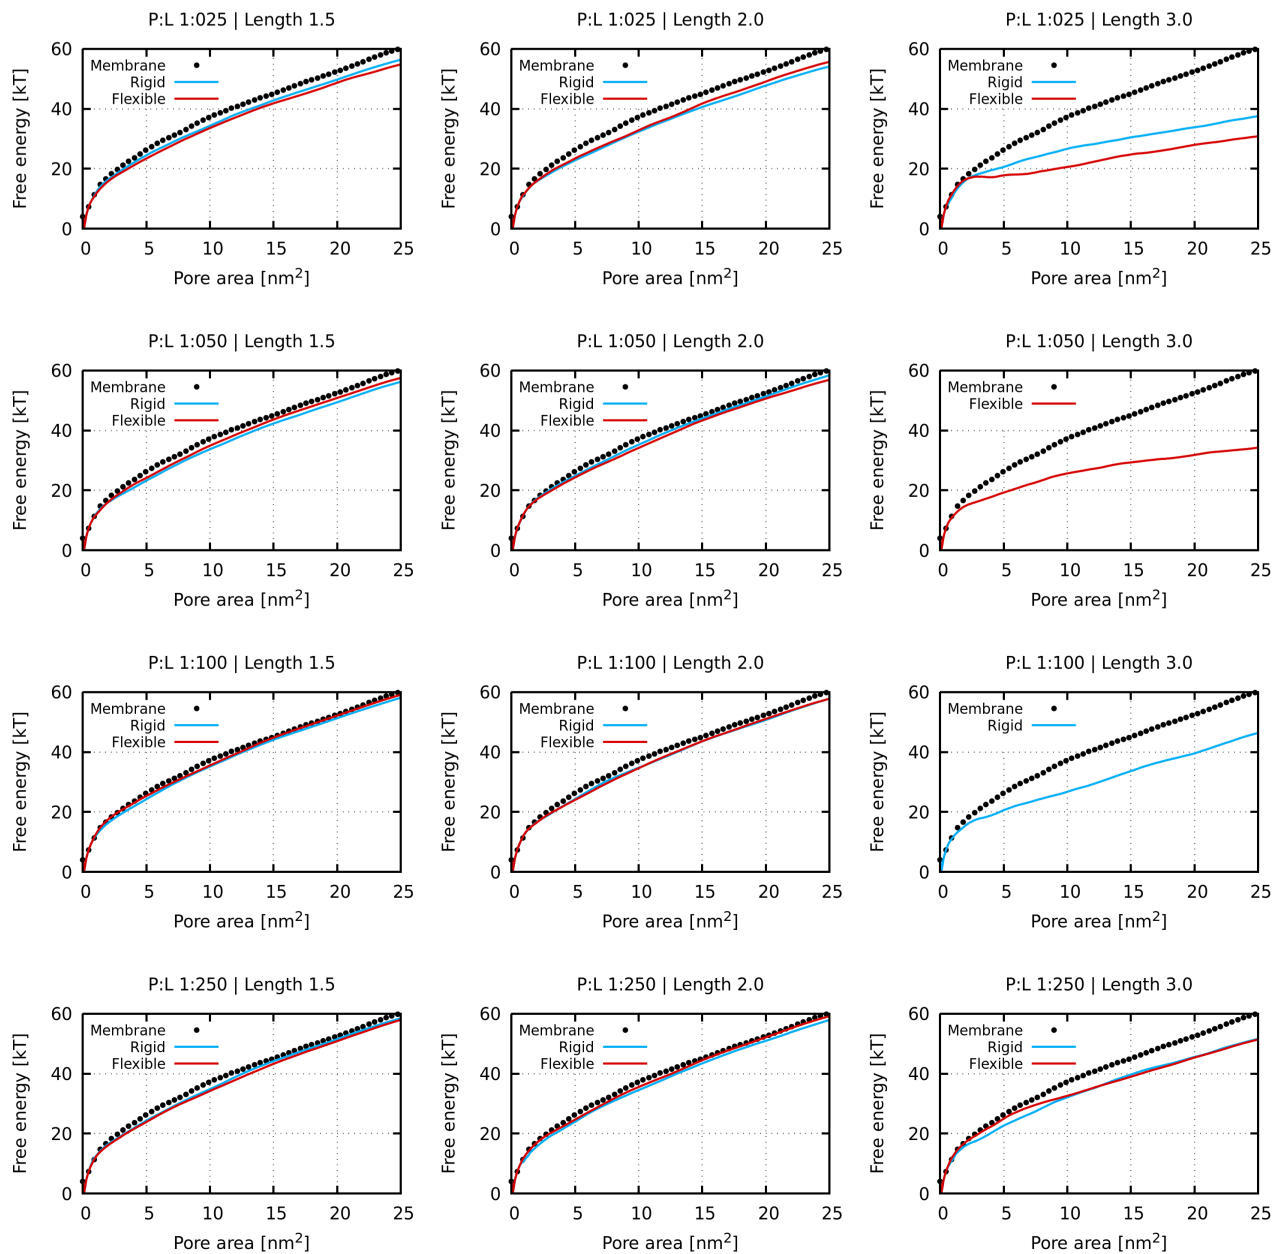

Figure S4. Free energy profiles for PSC-NE model peptides.

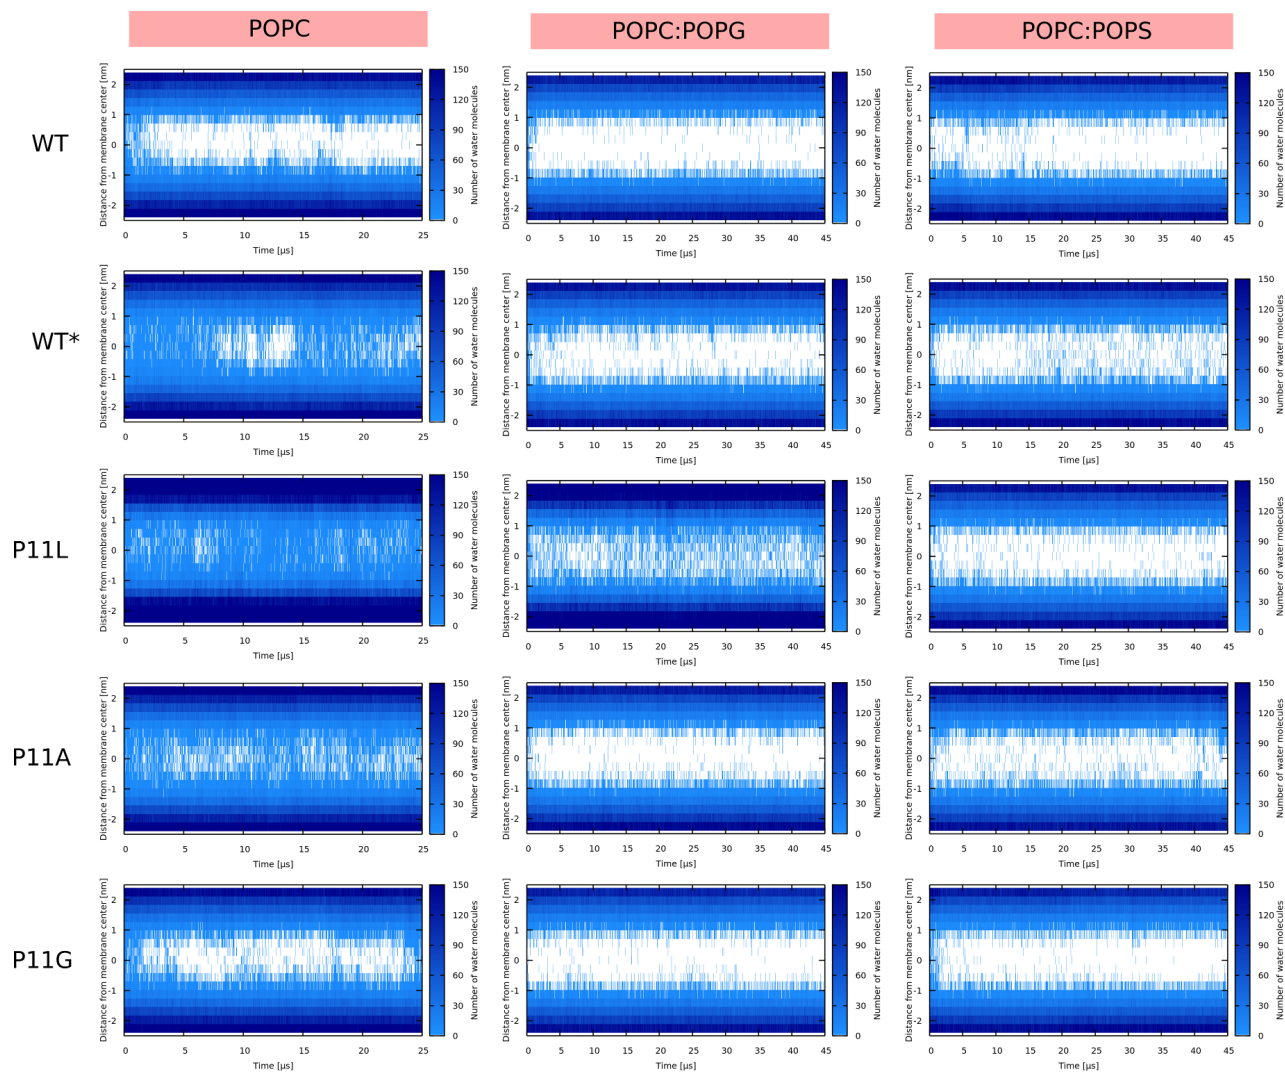

**Figure S5. Water density profiles for Buforin II peptides.** Note that WT\* stands for wild-type sequence where proline residue was forced to be  $\alpha$ -helical.

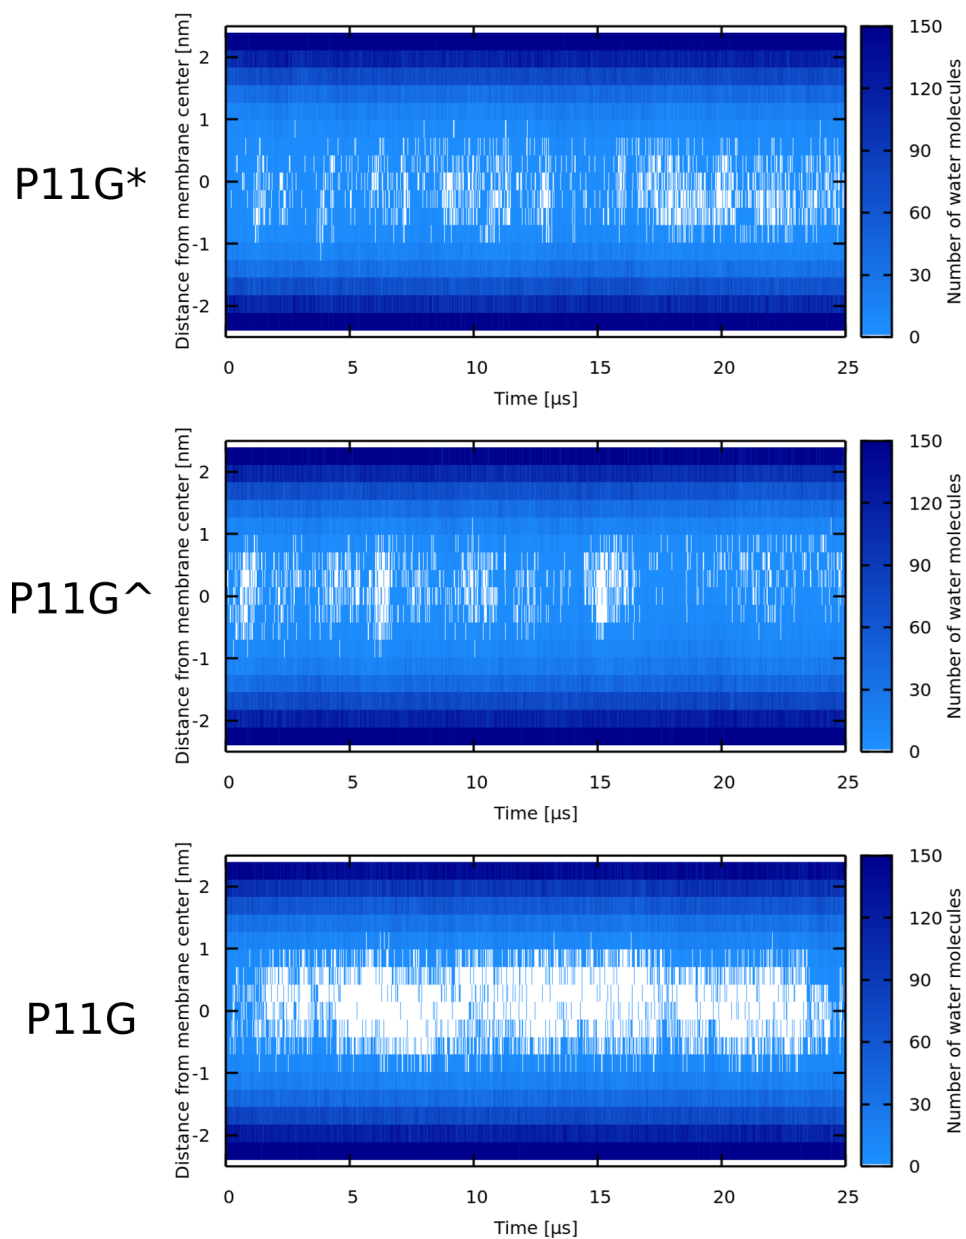

**Figure S6. Water density profiles for Buforin II peptides with mutated glycine residue in POPC membrane.** Note that WT\* stands for Buforin II P11G which was forced to be  $\alpha$ -helical. In case of Buforin II P11G^, only single coil in mutated glycine position has been used as a definition of secondary structure.

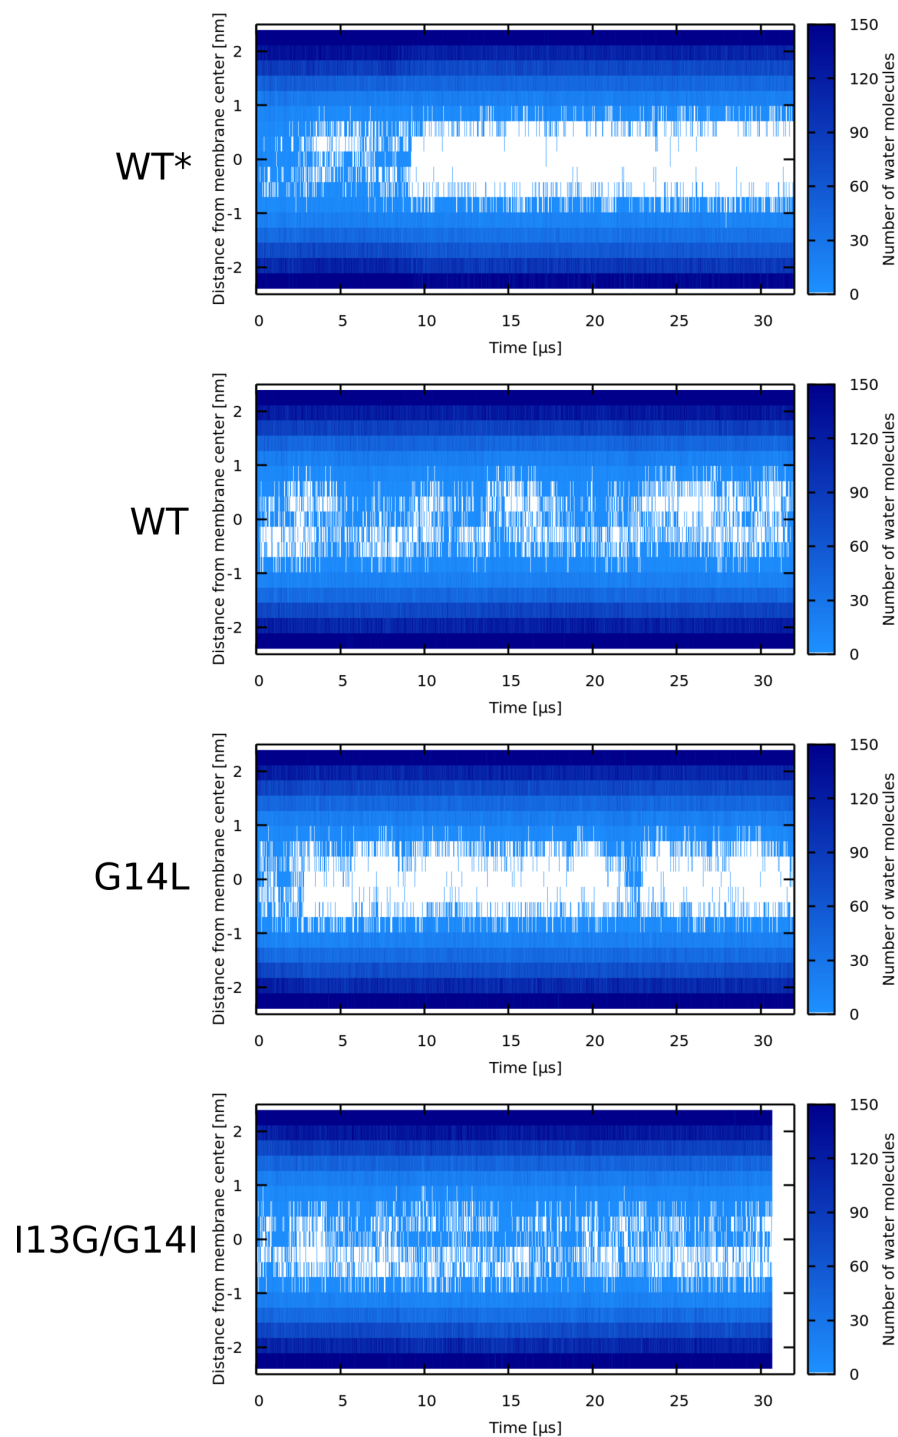

**Figure S7. Water density profiles for LL-37 peptides.** Note that WT\* stands for wild-type sequence where glycine residue was forced to be  $\alpha$ -helical.



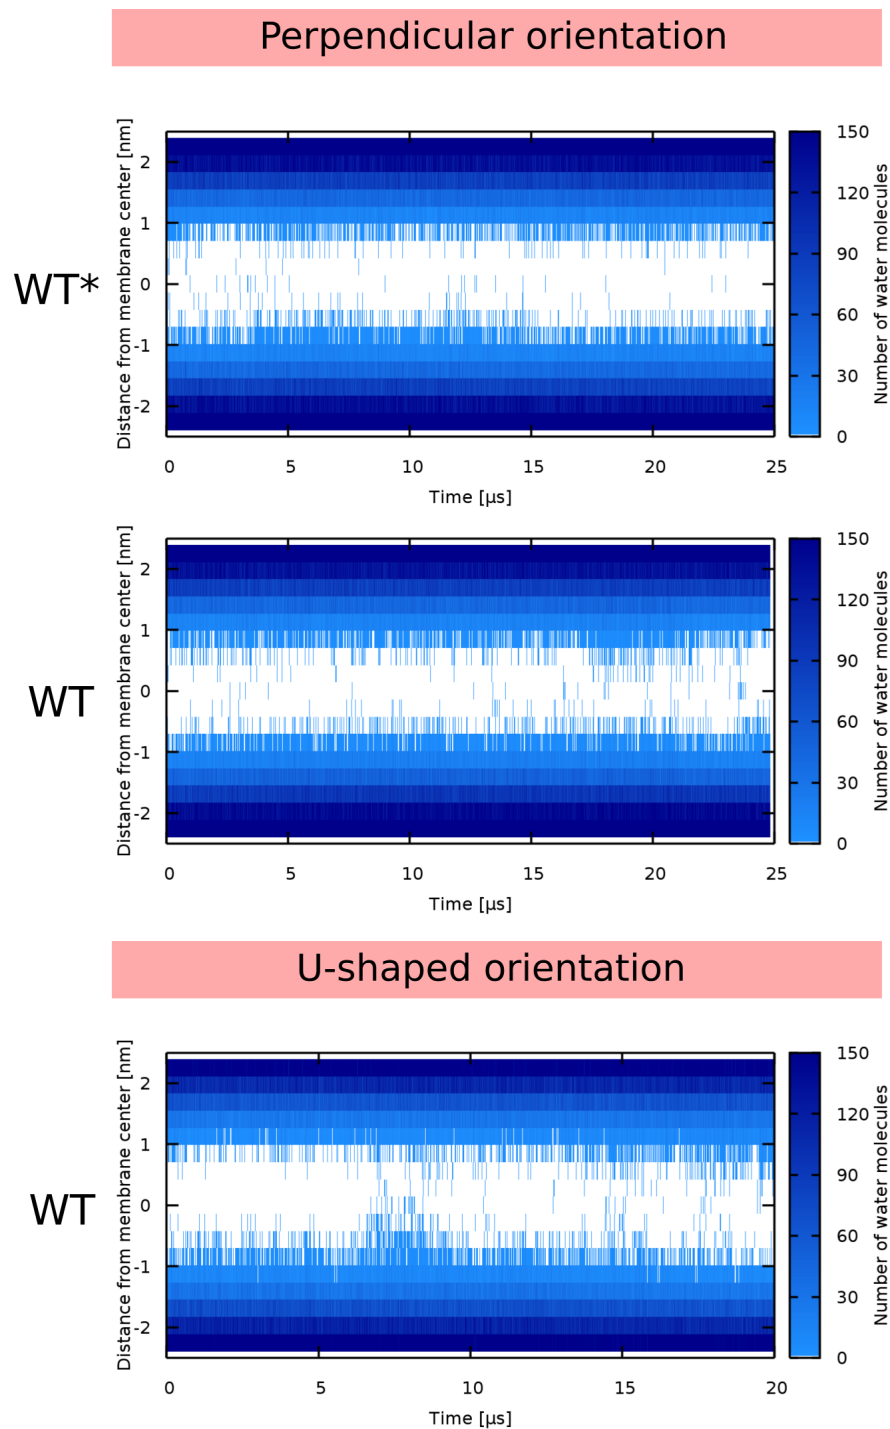

**Figure S8. Water density profiles for Candidalysin peptides (CandK).** Note that WT\* stands for wild-type sequence where proline residue was forced to be  $\alpha$ -helical.

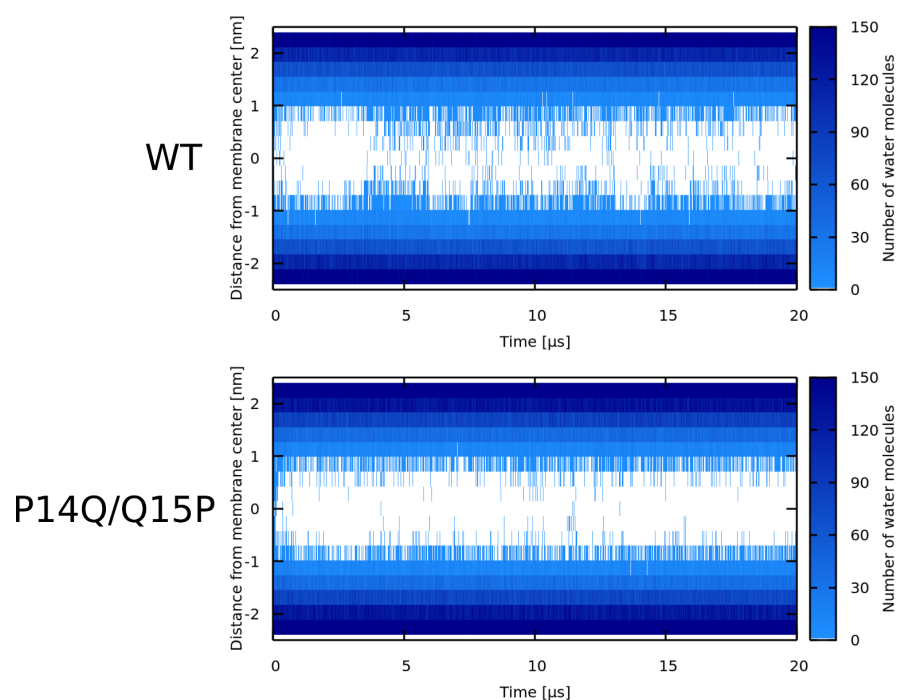

**Figure S9. Water density profiles for Candidalysin peptides (CandKR).** Note that WT\* stands for wild-type sequence where proline residue was forced to be  $\alpha$ -helical.

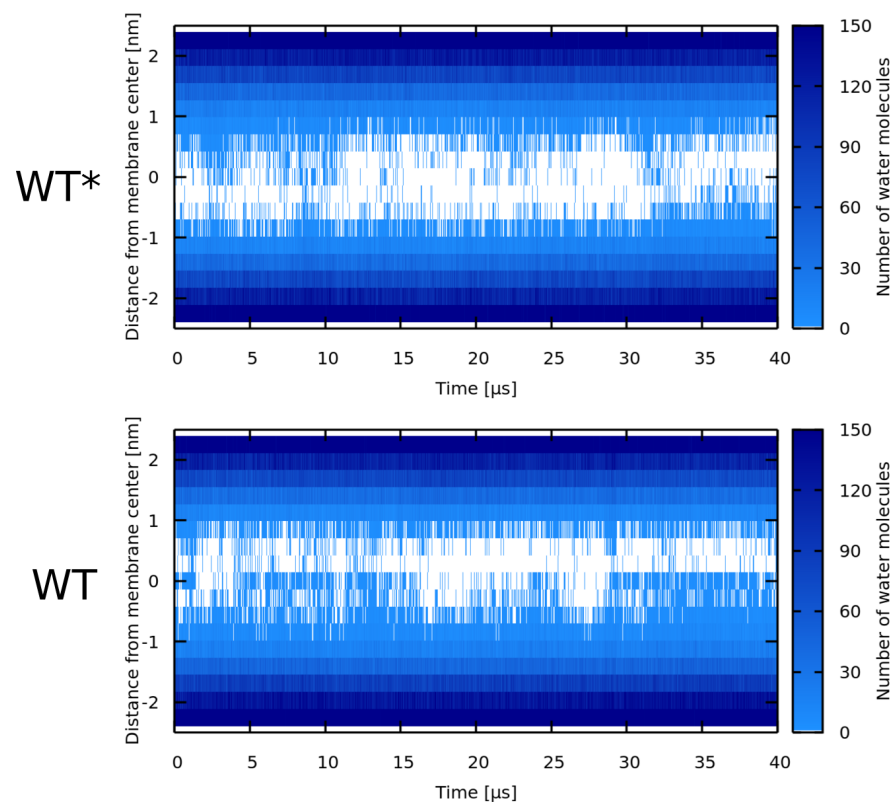

**Figure S10. Water density profiles for  $\delta$ -lysin peptides.** Note that WT\* stands for wild-type sequence where glycine residue was forced to be  $\alpha$ -helical.

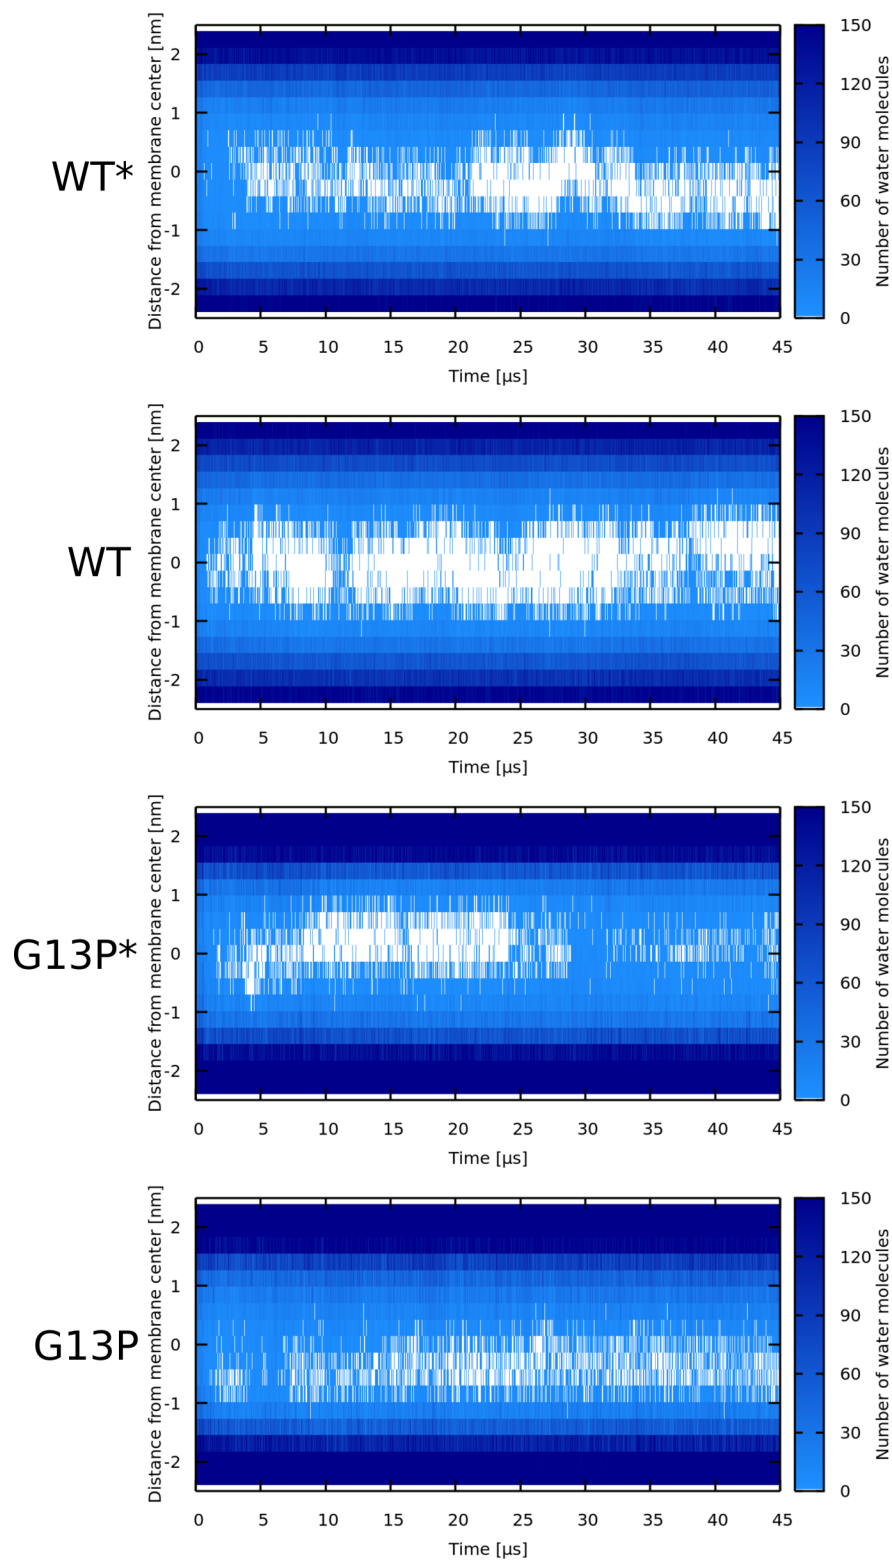

**Figure S11. Water density profiles for Magainin II peptides.** Note that WT\*/G13P\* stands for wild-type sequence where glycine/mutatetd proline residue was forced to be  $\alpha$ -helical.

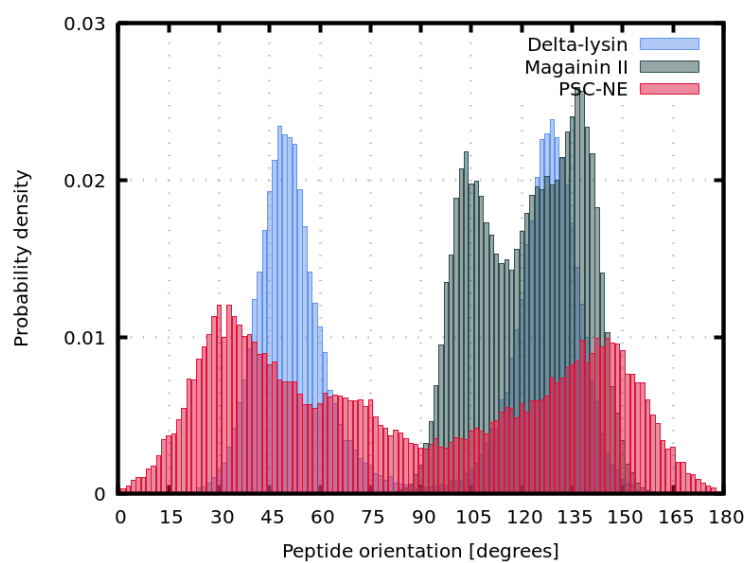

**Figure S12. Comparison of angles between peptides and z-axis in systems with synergistic interactions.** Phenomenological (PSC-NE) models (red), Magainin II peptides (green), and Delta-lysin peptides (blue).



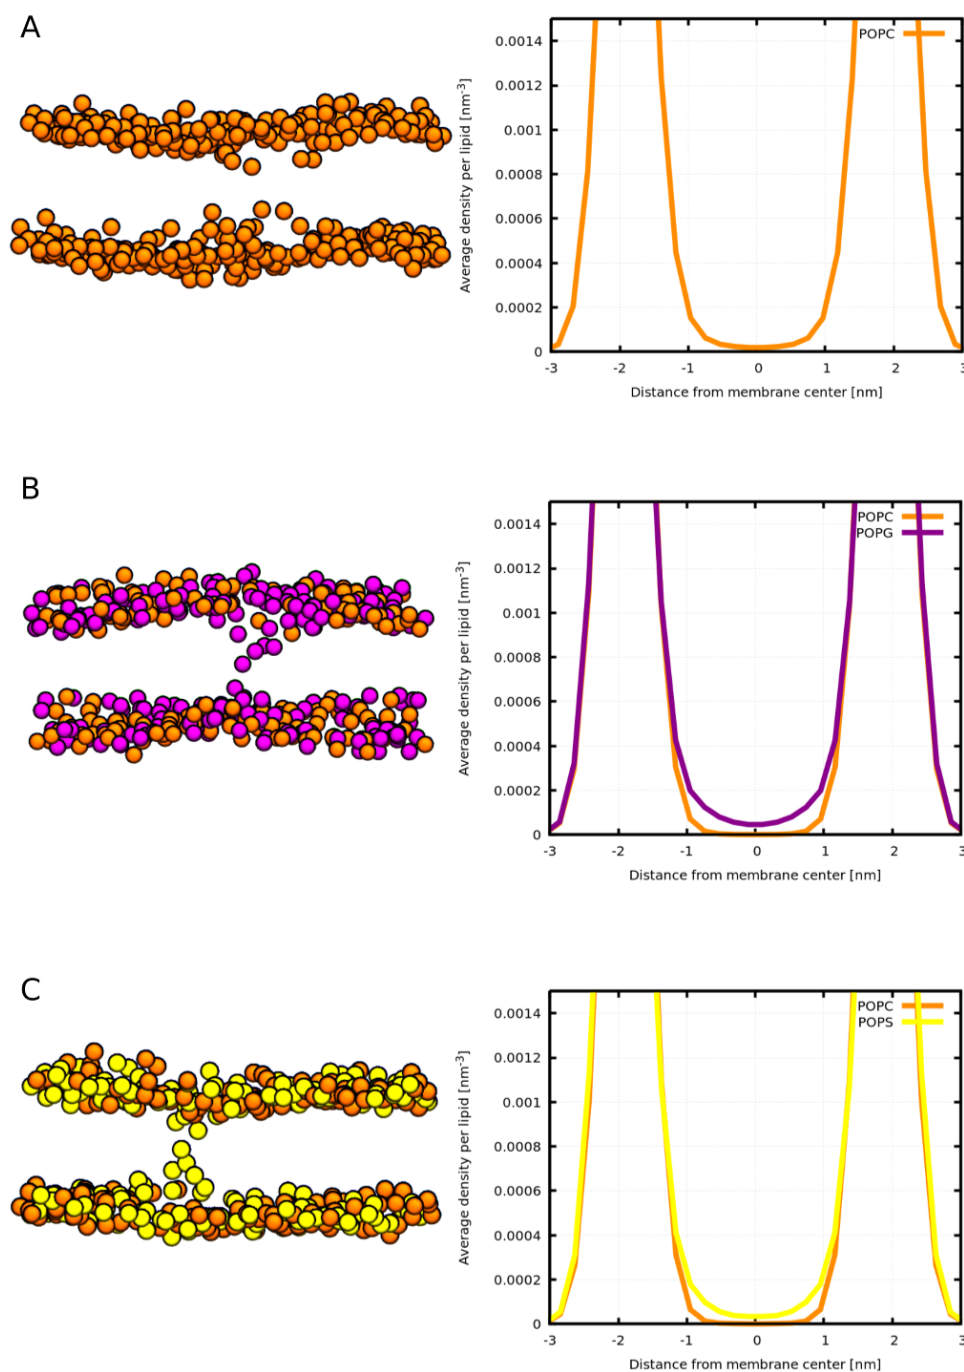

**Figure S13. Density profiles and associated snapshots from Martini simulations for phosphate groups in (A) POPC membrane, (B) POPC:POPG (1:1) membrane, and (C) POPC:POPS (1:1) membrane.** For a sake of clarity, only phosphate groups are depicted. Color coding: phosphate groups of POPC lipids = orange, phosphate groups of POPG lipids = purple, phosphate groups of POPS lipids = yellow.
